# The ESX-1 substrate PPE68 has a key function in the ESX-1 mediated secretion in *Mycobacterium marinum*

Merel P.M. Damen<sup>a</sup>, Aniek S. Meijers<sup>b</sup>, Esther M. Keizer<sup>a</sup>, Sander R. Piersma<sup>c</sup>, Connie R. Jiménez<sup>c</sup>,  
Coenraad P. Kuijl<sup>b</sup>, Wilbert Bitter<sup>a, b</sup>, Edith N. G. Houben<sup>a, #</sup>

<sup>a</sup>Section of Molecular Microbiology, Amsterdam Institute of Molecular and Life Sciences, Vrije  
Universiteit Amsterdam, Amsterdam, Netherlands

<sup>b</sup>Department of Medical Microbiology and Infection Control, Amsterdam UMC, Location VU  
Medical Center, Amsterdam, The Netherlands

<sup>c</sup>Department of Medical Oncology, OncoProteomics Laboratory, Cancer Center Amsterdam,  
Amsterdam UMC, Location VU Medical Center, Amsterdam, The Netherlands

## Running title

Central role of PPE68 in ESX-1 secretion

---

<sup>#</sup> To whom correspondence should be addressed. E-mail: e.n.g.houben@vu.nl.

## Abstract

Mycobacteria use specialized type VII secretion systems (T7SSs) to secrete proteins across their diderm cell envelope. One of the T7SS subtypes, named ESX-1, is a major virulence determinant in pathogenic species such as *Mycobacterium tuberculosis* and the fish pathogen *Mycobacterium marinum*. ESX-1 secretes a variety of substrates, called Esx, PE, PPE and Esp proteins, at least some of which as folded heterodimers. Investigations into the functions of these substrates is problematic, because of the intricate network of co-dependent secretion between several ESX-1 substrates. Here, we describe that the ESX-1 substrate PPE68 is essential for secretion of the highly immunogenic substrate EsxA and EspE via the ESX-1 system in *M. marinum*. While secreted PPE68 is processed on the cell surface, the majority of cell-associated PPE68 of *M. marinum* and *M. tuberculosis* is present in a cytosolic complex with its PE partner and the EspG<sub>1</sub> chaperone. Interfering with the binding of EspG<sub>1</sub> to PPE68 blocked its export and the secretion of EsxA and EspE. In contrast, *esxA* is not required for the secretion of PPE68, revealing hierarchy in co-dependent secretion. Remarkably, the final ten residues of PPE68, a negatively charged domain, seem essential for EspE secretion, but not for the secretion of EsxA and PPE68 itself. This indicates that distinctive domains of PPE68 are involved in secretion of the different ESX-1 substrates. Based on these findings, we propose a mechanistic model for the central role of PPE68 in ESX-1 mediated secretion and substrate co-dependence.

## Importance

*Mycobacterium tuberculosis* use type VII secretion systems (T7SSs) to secrete proteins across its uniquely hydrophobic diderm cell envelope. A T7SS subtype, called ESX-1, is one of its most important virulence determinants by mediating intracellular survival through phagosomal rupture and subsequent translocation of the mycobacterium to the host cytosol. Identifying the ESX-1 substrate that is responsible for this process is problematic because of the intricate network of co-dependent secretion between ESX-1 substrates. Here, we provide mechanistic insight into the central role of the ESX-1 substrate PPE68 for the secretion of ESX-1 substrates, using the model organism *Mycobacterium marinum*. Unravelling the mechanism of co-dependent secretion will aid the functional understanding of T7SSs and will allow the analysis of the individual roles of ESX-1 substrates in the virulence caused by this significant human pathogen.

## Introduction

The genus *Mycobacterium* belongs to the phylum Actinobacteria and includes the major human pathogens *Mycobacterium tuberculosis* and *Mycobacterium leprae*. Mycobacteria have a distinctive cell envelope that is shared with other bacteria within the order of the Corynebacteriales. The unique feature of their cell envelope are the long chained fatty acids, called mycolic acids, that assemble into a second hydrophobic bilayer, also known as the mycobacterial outer membrane (1). Mycobacteria have acquired specialized secretion systems, called the type VII secretion systems (T7SS), to export proteins across this multi-layered cell envelope. There are five paralogous T7SSs present in *M. tuberculosis*, called ESX-1 to ESX-5. The ESX-1 system is considered a major virulence factor of *M. tuberculosis* and the fish pathogen *Mycobacterium marinum* through its essential role in phagosomal rupture and subsequent translocation of the pathogens to the host cytosol (2–5). As a consequence, the absence of the *esx-1* region results in severe attenuation of pathogenic mycobacteria, which is further illustrated by the observation that a large deletion within the same region (RD1) is the prime cause of the attenuation of the live vaccine strain *Mycobacterium bovis* BCG (6–8).

The ESX-1 system secretes over a dozen different proteins, which all belong to the EsxAB clan (Pfam CL0352) and can be categorized into four distinctive protein families *i.e.* Esx/WxG100, PE, PPE and Esp. The best-studied and highly immunogenic ESX-1 substrates EsxA and EsxB belong to the Esx/WxG100 protein family, which are characterized by a WxG protein motif and generally are 100 amino acids long. PE35 and PPE68 are encoded within the same operon as *esxA* and *esxB* and belong to PE and PPE protein families that share homologous N-terminal domains of approximately 110 amino acids and 180 amino acids, respectively, with conserved proline–

glutamic acid (PE) and proline–proline–glutamic acid (PPE) motifs (9). While each T7SS secretes its own Esx proteins and often also PE and PPE substrates, the Esp proteins seem to be exclusively secreted by the ESX-1 system.

An intriguing feature of the mycobacterial T7SS substrates is that these proteins are secreted as folded heterodimers that are formed in the cytosol (10–13). While these heterodimers are formed by either Esx substrates or a PE protein with a specific PPE protein, available crystal structures reveal highly conserved features. Each complex forms a four-helix bundle, composed of two helix–turn–helix structures in an antiparallel orientation, with a conserved secretion motif (YxxxD/E) extending from the double-helix of one partner protein (14). In addition to the helix–turn–helix, the N-terminal domain of PPE proteins contain an extra region that is relatively hydrophobic and extends from the PE-PPE interface (15). This so-called helical tip is recognized by a cytosolic chaperone, called EspG, in an ESX system-specific manner, which recognition is required for secretion of the PE/PPE pair (11, 12, 14). In addition to the conserved dimeric structure formed by the N-terminal PE and PPE domains, which is thought to be involved in substrate recognition and secretion of the heterodimers, many PE and PPE proteins have highly variable C-terminal domains that could potentially execute specific functions (16–18). Only limited structural information is available for the Esp substrates, although structure predictions indicate that most of these substrates form similar heterodimers as PE/PPE proteins (19–21).

EsxA has been indicated to play a central role in ESX-1 mediated virulence, including the perturbation of phagosomal membranes (2–4, 22–24). However, while *in vitro* biochemical analyses suggest that EsxA has membranolytic activity (22, 25–30), later reports have ascribed at least some of these observations to detergent contaminations during the purification of EsxA (29,

31). Another complicating factor is that mutations in *esxA* abolishes the secretion of other ESX-1 substrates, such as EspA, EspF, EspJ, EspK and EspB in *M. tuberculosis* and/or *M. marinum* (32–34). In numerous cases, the co-dependence for secretion is mutual, as the deletion of specific *esp* genes also results in abolished EsxA secretion (32, 35–38). This complicates the analysis and interpretation of the role of individual ESX-1 substrates in virulence.

Co-dependent secretion has also been observed for substrates of other ESX systems (39–41). The underlying reason for this phenomenon however remains unclear. Previously, we have provided the first mechanistic insight into this process by the successful redirection of PE35\_1/PPE68\_1, the *M. marinum* paralogues of *esx-1* locus encoded PE35/PPE68, from the ESX-1 to the ESX-5 system (42, 43). Surprisingly, the redirection of these two ESX-1 substrates also resulted in redirection of EsxA\_1. This finding suggests a central role of the PE-PPE-EspG complex in the secretion of Esx substrates. Interestingly, deletion of *espG*<sub>1</sub> results in a general secretion defect not only of respective PE/PPE and Esx substrates in *M. marinum*, but also of Esp proteins (24, 33–35, 44, 45), indicating a central role for PE/PPE substrates in the secretion of all known ESX substrate classes. Here, we investigated the role of PPE68 in ESX-1 mediated secretion of EsxA and EspE in *M. marinum* and report that this PPE protein has a central function in the secretion of these two ESX-1 substrates.

## Results

**The *pe35/ppe68* pair is necessary for secretion of ESX-1 substrates EsxA and EspE, and for ESX-1-mediated hemolysis.** To study the effect of PPE68 on protein secretion, we created a frameshift mutation *M. marinum* M to minimize polar effects, using the efficient genome editing tool CRISPR1-Cas9 (46). The generated *ppe68* frameshift (fs) mutant that we selected contained a 1 bp insertion at position 181, which results in an early stop codon after amino acid 202 (Figure S1A). As expected, PPE68 could not be detected in pellet or supernatant fraction of this mutant (Figure 1B, lane 2, 7). In the WT strain, we could identify PPE68 in the pellet fraction but not in the supernatant (Figure 1B, lane 7), which is in line with the observations in *M. tuberculosis* (47). The *ppe68* mutant showed a loss of EsxA in the supernatant fraction, while no accumulation of EsxA in the pellet fraction was observed (Figure 1B, lane 2, 7). The lack of accumulation is possibly caused by a WhiB6-controlled negative feedback mechanism resulting in downregulated expression in the presence of an inactive ESX-1 secretion system (48, 49). In agreement, we observed that mRNA levels of *esxA* in the *ppe68* fs mutant was reduced to a comparable level as in an *eccCb<sub>1</sub>* core complex mutant (Figure S1C). Next, we analyzed the secretion of ESX-1 substrate EspE, which is an abundant cell-surface protein of *M. marinum* and can be extracted by the mild detergent Genapol X-080 (50, 51). The *ppe68* fs mutation prevented the secretion of EspE to the cell surface, while the intracellular levels of EspE in the mutant and the WT were comparable (Figure 1B, lane 2, 7). Complementation of the *ppe68* fs mutant with the *pe35/ppe68* pair, expressed from an integrative pMV vector, failed to restore detectable EspE and EsxA secretion (Figure 1B, lane 8); only the introduction of the complete *ppe68* operon, encompassing *pe35*, *ppe68*, *esxB* and *esxA*, using either the pMV or multicopy pSMT3 vector, restored EspE and

EsxA secretion (Figure 1B, lane 9-10). Analysis of three times higher amounts of culture supernatant revealed low levels of EsxA secretion in the *ppe68* fs mutant expressing the *pe35/ppe68* pair from a pSMT3 vector, while EspE secretion was fully restored (Figure S1D, lane 4). We have previously shown that overexpression of *esxB\_1/esxA\_1* in the WT blocked ESX-1 secretion, and that co-overexpression of the *pe35\_1/ppe68\_1* released this secretion block (42). These data indicate that balanced production of both heterodimers is required for efficient secretion, which could also be true in this situation.

To investigate the individual roles of *pe35/ppe68* and *esxB/esxA* in ESX-1 mediated secretion, we created an *M. marinum* knock-out strain that contained a deletion of the complete *pe35-ppe68-esxA-esxB* operon (Figure 1A). Again, no EspE was detected on the cell surface of the *ppe68* operon mutant, while the intracellular EspE levels were comparable to the WT (Figure 1C, lane 2, 9). Introduction of either *esxB/esxA* or *pe35/ppe68* on the integrative pMV vector failed to restore EspE and EsxA secretion (Figure 1C, lane 10-11). EspE and EsxA secretion was only restored when the entire *ppe68* operon was present on the introduced pMV or pSMT3 vector (Figure 1C, lane 12-13). Expression of the entire *ppe68* operon from the pSMT3 vector resulted in secretion levels similar to the WT. In addition, the *ppe68* operon of *M. tuberculosis* was also able to restore EspE and EsxA secretion by the *ppe68* operon mutant, showing that the function of the *ppe68* operon in ESX-1 secretion is conserved (Figure 1C, lane 14).

Next, we investigated the impact of the *ppe68* fs mutation on ESX-1 mediated membrane lysis, as an important readout for ESX-1 mediated virulence mechanisms (24). As expected, while WT *M. marinum* lysed sheep red bloods cells efficiently, a mutation in the ESX-1 core component EccC<sub>b1</sub> showed no effect above background levels (Figure 1D). Also the *ppe68* fs mutant



completely lost its hemolytic capabilities, which could be fully complemented by the introduction of the *ppe68* operon. Introduction of the *pe35/ppe68* pair on a pSMT3 plasmid and the *ppe68* operon of *M. tuberculosis* partially restored hemolysis (Figure 1C). In conclusion, *ppe68* is essential for the hemolytic activity of *M. marinum* and the secretion of EsxA and EspE, which role is conserved between *M. marinum* and *M. tuberculosis*.

# **The EspG<sub>1</sub>-binding domain of PPE68 is important for its central role in ESX-1 secretion.**

Previously, we reported that the EspG<sub>1</sub>-binding domain of PPE68\_1 (MMAR\_0186) is essential for secretion via the ESX-1 system (43). Specifically, a single amino acid substitution at position 125, located within this domain, abrogated PPE68\_1 secretion to the culture supernatant without affecting its production. Similarly, the conserved amino acid in an ESX-5 dependent PPE protein (L125) is essential for EspG<sub>5</sub> binding and its secretion (11). To investigate the role of EspG<sub>1</sub>-binding to PPE68, an equivalent F125A amino acid substitution was introduced in the *ppe68* operon on the pSMT3 vector, with a Strep-tag to the C-terminus of PPE68 for detection purposes. Immunoblot analysis showed that PPE68.strep was properly produced and, as expected, ran slightly higher on an SDS-PAGE gel (Figure 2A, lane 4). Importantly, complementation of EsxA and EspE secretion by the *ppe68* operon mutant was not affected by the Strep-tag (Figure 2A, lane 12). While the F125A substitution did not affect the stability of this PPE68 variant (Figure 2A, lane 5), it could not restore WT levels of EsxA secretion and showed severely reduced EspE secretion in the *ppe68* operon mutant (Figure 2A, lane 13). This result indicates that recognition of PPE68 by EspG<sub>1</sub> is indeed important for its role in ESX-1 secretion.

As we were unable to directly assess the secretion of PPE68, but previously could observe secretion of PPE68\_1 (42, 43), we further investigated the paralogous *ppe68\_1* operon, consisting

172 of *pe35\_1*, *ppe68\_1*, *esxB\_1* and *esxA\_1* (Figure 1A). While *esxB\_1* and *esxA\_1* are almost  
 173 identical to their paralogs in the *esx-1* gene cluster, *pe35\_1* and *ppe68\_1* show lower similarity,  
 174 particularly for the C-terminal domains of the PPE proteins (Figure 1A and S2). Notably, deletion  
 175 of this four-gene paralogous region did neither affect EspE secretion nor the hemolytic activity of  
 176 *M. marinum*, showing that these endogenous genes are dispensable for these specific ESX-1  
 177 mediated processes (Figure S3). To assess the importance of the C-terminal domain of the PPE68  
 178 paralogs in ESX-1 secretion, we constructed a pSMT3 plasmid containing the *ppe68\_1* operon  
 179 (*mmar\_0185-88*) and a *ppe68/ppe68\_1* hybrid operon construct, containing *pe35\_1*, the N-  
 180 terminal domain of *ppe68\_1* (PPE domain, residue 1-175, see Figure S2), the C-terminal domain  
 181 of *ppe68* (encoding for residue 176-367), *esxA* and *esxB*. Again, a Strep-tag was introduced to the  
 182 C-terminus of the PPE variants for detection purposes. Surprisingly, both the *ppe68\_1* operon  
 183 and the hybrid operon re-established EsxA and EspE secretion in the *ppe68* operon mutant  
 184 (Figure 2A, lane 14-15), while the *ppe68\_1* operon was also able to restore hemolytic activity in  
 185 the *ppe68* fs mutant (Figure S3B). These results show that the paralogous, but divergent PPE68\_1  
 186 is functionally similar to the PPE68 with regard to their role ESX-1 secretion. However, the fact  
 187 that deleting the paralogous PPE68\_1 region did not impact ESX-1 secretion indicates that this  
 188 region is not expressed under the conditions used. Notably, while some low amounts of HA- or  
 189 FLAG-tagged PPE68\_1 could previously be detected in culture supernatants of *M. marinum* M  
 190 (42, 43), PPE68\_1 with a Strep-tag could not clearly be detected in this fraction (Figure 2A, lane  
 191 14). In contrast, the PPE68\_1/PPE68 hybrid could readily be observed in the culture supernatant  
 192 using the anti-PPE68 antibody (Figure 2A, lane 15). The anti-StrepII antibody failed to visualize  
 193 this protein in this fraction, likely due to C-terminal processing of the PPE68\_1/PPE68 hybrid upon

secretion (see below). Most importantly, the introduction of an L125A mutation in the EspG<sub>1</sub>-binding domain of the PPE68\_1/PPE68 hybrid completely blocked its ability to complement secretion of EspE and EsxA in the *ppe68* operon mutant and also abrogated the secretion of the PPE68\_1/PPE68 hybrid itself (Figure 2A, lane 16). These combined results show that the amino acid in position 125, located within the helical tip of the EspG<sub>1</sub>-binding domain, is essential for the export of the PPE68/PPE68\_1 hybrid, which in turn is necessary for the secretion EspE and EsxA.

**The C-terminal domain of PPE68 is necessary for ESX-1 mediated secretion.** While the C-terminal domains of PPE68\_1 and PPE68 are relatively dissimilar, they possess a well-conserved stretch of 15 amino acids consisting of an unusual high amount of negatively-charged residues at their C-termini. To investigate the role of the C-terminal domain of PPE68 in more detail, several C-terminal truncations were made, namely PPE68ΔC (residue 1-174), PPE68Δ112 (residue 1-256) and PPE68Δ10 (residue 1-357) (Figure S2), including a C-terminal Strep-tag and encoded by the pSMT3 vector together with *pe35*, *esxB* and *esxA*. Immunoblot analysis of the pellet fractions using the anti-Strep antibody showed that the two more severe C-terminal truncations of PPE68 were detected in lower amounts, and only the PPE68Δ10 variant was produced at similar levels as the full-length protein (Figure 2B, lane 4-6). The anti-PPE68 antibody could only recognize the PPE68Δ10 variant, indicating that the antibody primarily recognizes the C-terminal domain of this protein. PPE68Δ122 and PPE68Δ10 were able to restore EsxA secretion by the *ppe68* operon mutant (Figure 2B, lane 11-12), whereas with the PPE68ΔC variant EsxA secretion could hardly be observed, most-likely because this variant is not stably produced (Figure 2B, lane 10). In contrast, while the intracellular protein levels of EspE were similar between all strains, none of

the PPE68 variants showed detectable secretion of EspE (Figure 2B, lane 4-6 and 10-12). These results suggest that the C-terminal domain of PPE68 is not required for EsxA secretion, but it is necessary for the secretion of EspE.

**PPE68 is secreted independently from EsxA/EsxB and processed on the cell surface.** Although PPE68 contains all characteristics of an ESX substrate, we were not able to detect this protein in culture supernatants (Figure 1 and 2). However, when we obtained a concentrated cell surface protein extract from larger cultures that were additionally grown without Tween-80, which was shown to retain surface proteins (51), low levels of PPE68 were detected in the surface extract of WT *M. marinum* (Figure 3A, lane 8). Here, PPE68 seemed to be processed, as multiple bands were recognized by the anti-PPE68 antibody. Only full length PPE68 was observed by the anti-StrepII antibody, suggesting that the other bands detected by the anti-PPE68 antibody represent C-terminal truncates. C-terminal processing of the Strep-tag was also observed for the secreted fraction of the PPE68\_1/PPE68 hybrid (Figure 2A). As we were now able to detect surface-localized PPE68, we analyzed whether the export of PPE68 is dependent on the co-expression of *esxB/esxA*. Importantly, a pSMT3 vector with only the *pe35/ppe68.strep* genes fully restored PPE68 secretion to the cell-surface by the two *ppe68* mutants (Figure 3A, lane 11, 14). As the *ppe68* operon mutant does not contain a genomic copy of *esxB/esxA*, these results suggest that PPE68 can be secreted independently of EsxA (Figure 3A, lane 14). Intriguingly, only full length PPE68.strep was detected on the cell surface of the complemented *ppe68* operon mutant, suggesting that surface-processing of PPE68 might be dependent on the co-secretion of EsxA.

The various processed forms of PPE68 on the surface indicates that this protein is degraded upon secretion. Previously, the aspartic protease PecA was shown to cleave PE\_PGRS

proteins on the cell surface of *M. marinum* (18). We therefore hypothesized that this protein together with its paralogs PecB and PecC could be involved in cell surface processing of PPE68. Using a *pecA-pecB-pecC* triple fs mutant, created using CRISPR1-Cas9 gene editing (Meijers *et al.*, manuscript in preparation), we could confirm that, while PPE68 levels were similar in the Genapol pellet fractions (Figure 3B, lane 1, 4), the amount of PPE68 protein that was detected in the upscaled cell surface extract was significantly higher in the *pecABC* fs mutant compared to that of the WT (Figure 3B, lane 9, 12). This shows that the amount of exported PPE68 is in fact higher than was previously assumed. As similar processing of surface-localized PPE68 was still observed in the *pecABC* fs mutant, another protease should be involved in this process. A prime candidate would be the serine protease MycP<sub>1</sub>, which is one of the conserved ESX-1 components. However, a point mutation in the active site of MycP<sub>1</sub> (52) did not affect the surface processing of PPE68 (Figure S4).

Next, we exploited the increased amount of cell surface-localized PPE68 in the *pecABC* fs mutant to further investigate the requirement for PPE68 secretion. When we disrupted the interaction with EspG<sub>1</sub> by the F125A mutation, PPE68.strep was not detected in the surface fraction (Figure 3B, lane 13), confirming the importance of the EspG<sub>1</sub> interaction for secretion. Interestingly, deletion of the C-terminal 10 amino acids of PPE68, which did not majorly affect EsxA secretion but abrogated secretion of EspE, did not interfere with secretion of PPE68 itself (Figure 3B, lane 15). To summarize, PPE68 is exported to the cell surface of *M. marinum*, where it is subsequently degraded. Secretion of PPE68 depends on its interaction with EspG<sub>1</sub>, but is independent of co-expression of *esxB/esxA* and its final 10 amino acids.

**Intracellular PPE68 forms a complex with EspG<sub>1</sub> and a PE protein.** While low amounts of PPE68 could be extracted from the cell surface, a large portion of PPE68 remained cell-associated upon detergent treatment (Figure 3). In *M. tuberculosis*, PPE68 was shown to localize to the cell envelope fraction by subcellular fractionations (8, 53). However, when we fractionated *M. marinum* cells by high-pressure lysis followed by ultracentrifugation, we found the entire population of intracellular PPE68 to be present in the soluble fraction (Figure 4A). In an *eccC<sub>a1</sub>* deletion strain, production and solubility of PPE68 was similar as in the WT, while deleting the *espG<sub>1</sub>* chaperone gene drastically reduced the amount of PPE68. Exogenous expression of the entire *ppe68* operon in the *ppe68* operon mutant did not alter the solubility of PPE68 (Figure 4B). To test whether the observed difference in solubility between PPE68 homologs was species-specific or dependent on experimental procedures, we fractionated *M. marinum* expressing the *ppe68* operon of *M. tuberculosis* and the auxotrophic *M. tuberculosis* strain mc<sup>2</sup>6020 using the same procedure. In both cases, PPE68 of *M. tuberculosis* was again exclusively present in the soluble fraction, from which we conclude that the observed differences for PPE68 localization are a results of different protocols for cell lysis and subcellular fractionation.

The current paradigm is that PPE proteins interact with a specific PE partner and a system-specific EspG chaperone in the cytosol prior to secretion (11, 12, 54). Analysis of PPE68 complex formation by blue native PAGE (BN-PAGE) revealed three major intracellular complexes ranging from ~70 to 180 kDa (Figure 4C, lane 1). Both the *ppe68* operon mutant and the  $\Delta$ *espG<sub>1</sub>* mutant did not show any PPE68 complex formation (Figure 4C, lane 3-4). In the soluble fraction of the  $\Delta$ *eccC<sub>a1</sub>* mutant, in which export of PPE68 is blocked, the largest (~180 kDa) and predominant complex was observed in similar amounts as in the WT fraction (Figure 4C, lane 2), suggesting

that a large portion of PPE68 in WT bacteria is retained in the cytosol. The additional two complexes were absent in the  $\Delta eccC_{a1}$  mutant, indicating that these two assemblies are only formed in the presence of a functional ESX-1 membrane complex. Complementation the *ppe68* operon mutant with the *ppe68* operon of *M. marinum*, either using the pMV or pSMT3 plasmid, restored formation of the ~180 kDa PPE68 complex, while the two smaller complexes were only clearly observed when complemented with the pSMT3 vector (Figure 4C, lane 5-6). This difference could be due to higher expression levels of the operon genes of the latter vector, compared to that of the integrative pMV vector.

To analyze the composition of the observed complexes, a Strep-affinity purification was performed on the soluble fractions of the  $\Delta eccC_{a1}$  and *ppe68* operon mutant, producing Strep-tagged PPE68 from either the pMV or pSMT3 vector containing the full *ppe68* operon. Both mutants containing the *ppe68* operon without a Strep-tag sequence were included as negative controls. BN-PAGE analysis of the purified samples showed a similar pattern of PPE68 complexes as seen for endogenous PPE68 (Figure S5C). LC-MS/MS analysis showed that the PPE68.strep samples, purified from the  $\Delta eccC_{a1}$  mutant, contained, as expected, PPE68 and the chaperone EspG<sub>1</sub>. The third protein that was present in high amounts was an *M. marinum*-specific PE protein, named MMAR\_2894 (Figure 4D and Table S1). Interestingly, this protein was already identified as an ESX-1 substrate (44). Notably, PE35 of *M. marinum* lacks, unlike its ortholog in *M. tuberculosis*, a general YxxxD/E secretion motif (Figure S6) (14), which might explain why PPE68 binds an alternative partner in *M. marinum*. As PE35\_1 was also not detected, MMAR\_2894 seems to be the only PE partner of PPE68 in *M. marinum*. EspG<sub>1</sub> and MMAR\_2894 were also the predominant co-purified proteins of PPE68 purified from the complemented *ppe68* operon

mutant, confirming that intracellular PPE68 localizes to the cytosol also in the presence of a functional ESX-1 system (Figure 4E and Table S1). PPE68.strep produced from the pSMT3 vector in both the *ppe68* operon and  $\Delta eccC_{a1}$  mutant also showed the specific co-purification of EspG<sub>1</sub> and MMAR\_2894 (Figure S5D and E).

To confirm the presence of MMAR\_2894 and EspG<sub>1</sub> in the PPE68 complexes, we created an *mmar\_2894* fs mutant and analyzed the PPE68F125A variant, respectively. The *mmar\_2894* fs mutant, which contained a 13 bp deletion after 192 base pairs that resulted in an early stop codon after 68 amino acids (Figure S1B), showed an ESX-1 secretion defect and loss of hemolytic capabilities similar to the *ppe68* fs mutant (Figure S7A-C). While PPE68 was detectable and soluble in the *mmar\_2894* fs mutant, BN-PAGE analysis showed that the major ~180 kDa complex was absent in this mutant. The smaller two complexes were still present, suggesting only the predominant complex contained MMAR\_2894 (Figure 5B, lane 3). With the PPE68F125A variant, no complexes could be observed by BN-PAGE analysis (Figure 5B, lane 5), while it was detectable and in the soluble fraction by SDS-PAGE analysis, suggesting that all three complexes contain EspG<sub>1</sub>.

Finally, we also analyzed complex formation of PPE68 from *M. tuberculosis* using both heterologous expression of the *ppe68* operon in *M. marinum* and the auxotrophic *M. tuberculosis* strain mc<sup>2</sup>6020. The observed PPE68 complexes in both strains have the same size as PPE68\_1.strep and the PPE68\_1/PPE68.strep hybrid. The smaller size of these complexes compared to the ~180 kDa PPE68<sub>mmar</sub> complex could be due to the sizes of their most likely PE partners, i.e. PE35\_1 and PE35<sub>mtub</sub>, respectively, which are smaller (9 kDa) than MMAR\_2894 (22 kDa). Structural analysis suggests that PE-PPE-EspG complexes are formed by a single copy of



each protein (11, 12), resulting in a molecular weight for MMAR\_2894-PPE68-EspG<sub>1</sub> of *M. marinum*, and both PE35\_1-PPE68\_1-EspG<sub>1</sub> of *M. marinum* and PE35-PPE68-EspG<sub>1</sub> of *M. tuberculosis* of 89 kDa and 74 kDa, respectively. The fact that the observed complexes have twice the molecular weight, i.e. ~180 kDa and ~150 kDa, respectively, indicate that the PE-PPE-EspG complexes form a dimer of trimers in the cytosol of mycobacteria. In summary, our fractionation and pulldown results suggest that cell-associated PPE68 of *M. marinum* and *M. tuberculosis* is mainly located in the cytosol, where it is in a complex together with EspG<sub>1</sub> and its PE partner.

**The role of PPE68 in ESX-1 secretion: a model.** Based on our results we propose a working model for PPE68 in the secretion of EsxA and EspE via the ESX-1 secretion system in *M. marinum* (Figure 6). In the cytosol PPE68 forms a stable complex together with its PE partner, i.e. MMAR\_2894 in *M. marinum*, and chaperone EspG<sub>1</sub>. Upon targeting to the ESX-1 membrane complex, the PE/PPE pair binds to the central ATPase EccC<sub>ab1</sub>, possibly to the linker 2 domain between nucleotide-binding domain (NBD) 1 and 2, a previously proposed recognition site for PE/PPE substrates (55). Based on our observation that PPE68 does not require EsxA/EsxB for its secretion, this binding event is enough to trigger activation of the translocation channel. As a second step, EsxA/EsxB binds, based on *in vitro* binding studies and structural analysis, to NBD3 of EccC<sub>ab1</sub> (23, 56–58). The Esx pair probably also interacts with the PE/PPE pair at the membrane complex, as PE35\_1/PPE68\_1 has been shown to determine the system-specificity of EsxB\_1/EsxA\_1 (42). As the third step, EspE is targeted with its predicted partner EspF and chaperone EspH (44) to the same ESX-1 complex. Secretion of the PE/PPE and Esx pairs probably does not depend on EspE, as mutations in EspH only affects secretion of EspE and EspF (44). Subsequently, the three substrate pairs are transported together through the channel at the cost of ATP hydrolysis by the

347 EccC ATPases. EspE interacts with the C-terminus of PPE68 during the translocation process, as  
348 these residues are important for the secretion of specifically this Esp substrate. The mechanism  
349 of translocation across the mycobacterial outer membrane remains unknown. While it is  
350 tempting to speculate that PPE68 plays a role in the process, the protein does not form a stable  
351 channel in this specific membrane. Instead, the main portion of PPE68 exists as a cytosolic pool,  
352 where it serves as a reservoir to facilitate secretion of the other ESX-1 substrates. Once PPE68 is  
353 exported to the cell surface, it is processed and/or degraded by PecABC and an unspecified  
354 protease.

## Discussion

The ESX-1 substrate EsxA is an abundantly secreted and highly immunogenic protein of *M. tuberculosis* and *M. marinum* (59–61) and has therefore been a major focus to get mechanistic insight into the essential role of ESX-1 in phagosomal membrane rupture by these pathogens (2–4, 22–24). However, the investigation of EsxA, or other ESX-1 substrates, remains difficult due to the co-dependent secretion of these substrates (32, 35–38). Here, we report that ESX-1 substrate PPE68, which is encoded within the same operon as EsxA, plays a central role in the secretion of EsxA and EspE in *M. marinum* and provide mechanistic insight into the observed co-dependent secretion of these substrates.

First, we showed that PPE68 is exported in an ESX-1 dependent manner to the cell surface of *M. marinum*. While previous mass spectrometry analysis could also detect this protein in culture supernatants of *M. marinum* (34, 44), we could not detect PPE68 in similar fractions by immunoblot analysis. Intriguingly, this protein is degraded upon secretion to the cell surface, as a deletion of three Pec proteases (PecABC) increases the amount of PPE68 on the cell surface. This provides an explanation for the low amount of exported PPE68 we detected. The observation that the *pecABC* deletions did not affect the processing pattern of PPE68 protein suggests that an additional protease is involved in its processing/degradation.

A frameshift mutation in *ppe68* abolishes secretion of EsxA and EspE, and hemolytic activity by *M. marinum*, which could be fully complemented by introduction of the *pe35-ppe68-esxB-esxA* operon. The role of PPE68 in the secretion process depends on the export of the PPE protein, as a point mutation in its EspG<sub>1</sub>-binding domain that blocks PPE export, abolishes

secretion of the other ESX-1 substrates. Importantly, PPE68 export is independent of *esxA/esxB* expression, showing there is a hierarchy in co-dependent secretion. While the Esx pair has been considered to be important for secretion of all other ESX substrates, this is, to our knowledge, the first demonstration of an ESX-1 substrate that is fully independent of *esxB/esxA* for its export. Notably, we showed that PPE68 of *M. tuberculosis* can take over the central role of endogenous PPE68 of *M. marinum* in ESX-1 mediated secretion and hemolysis. This contrasts previous studies, showing that interruption of the *ppe68* gene did not affect secretion of EsxA in *M. tuberculosis* H37Rv (53, 62), although similar mutations did affect growth of these strains in a mouse infection model (62, 63). While the reason for the observed differences in requirements for EsxA secretion remains unclear, these might be caused by a variation in *in vitro* growth conditions, similarly as previously observed for the importance of the conserved cytosolic component EccA<sub>1</sub> in secretion (44). Notably, a recent proteo-genetic study also revealed the importance of PPE68 and MMAR\_2894 for ESX-1 mediated secretion in *M. marinum* (64), fully supporting our results.

A co-dependent relationship between substrates of the same ESX system could be explained by a more integral role of specific substrates in the translocation process itself. Interestingly, PPE68 of *M. tuberculosis* has previously been shown to localize to cell envelope fractions (8, 53), which could suggest a role in substrate translocation across the second mycobacterial membrane. However, we observed that cell-associated PPE68 is soluble, both in *M. marinum* and *M. tuberculosis*, which is not expected for an outer membrane channel. These contrasting observations are probably caused by experimental differences. Although a function for PPE68 in outer membrane translocation is still possible, the fact that we find this protein predominantly in the cytoplasmic compartment points towards a role in substrate recognition

and/or activation by the ESX-1 inner membrane complex. Our previous observation that PPE68\_1 determines through which ESX system EsxA\_1 is exported by *M. marinum* is in agreement with such a function (42). In addition, a domain in the EccC ATPase component, *i.e.* linker2 between NBD<sub>1</sub> and NBD<sub>2</sub>, has previously been shown to be involved in species-specific secretion of PE\_PGRS proteins via the ESX-5 system (55). We therefore propose that binding of the PE/PPE pair to linker2 on EccC<sub>ab1</sub> could trigger the activation of the ATPases and the opening of the ESX inner membrane complex.

Interestingly, we observed that the final 112 amino acids of PPE68 are dispensable for EsxA secretion. This suggests that the conserved N-terminal PPE domain of this protein, probably together with the PE domain of its partner, is involved in the secretion of other ESX-1 substrates. This involvement could be indirect, by activation of the ESX membrane channel, but could also be mediated by a direct interaction of the two substrate pairs. In contrast, the C-terminus of PPE68 seems to be required for the secretion of EspE, *i.e.* deletion of only the C-terminal ten amino acids already blocked EspE secretion. This charged C-terminal tail is conserved in the PPE68 homolog of *M. tuberculosis* and the PPE68\_1 paralog in *M. marinum*, possibly explaining why these homologs are able to complement EspE secretion in the *M. marinum* *ppe68* mutants. We propose that EspE interacts with the C-terminal domain of PPE68 during the secretion process.

The major portion of cytosolic PPE68 is in a ~180 kDa complex with the EspG<sub>1</sub> chaperone and an unexpected PE protein, namely MMAR\_2894. MMAR\_2894 has previously been identified as an ESX-1 substrate with a role in hemolysis (44, 65). Mutating *mmar\_2894* leads to the absence of the major cytosolic PPE68 complex and a secretion and hemolytic defect identical to the *ppe68* fs mutant, which confirms that MMAR\_2894 is the PE partner of PPE68 in *M. marinum*. This also

means that PPE68 does not pair with the adjacently encoded PE35, which explains why PE35 lacks a T7SS signal (YxxxD/E). Apparently, during evolution PE35 was replaced by MMAR\_2894 and lost its function, or *vice versa*. Analysis of multiple available *M. marinum* genomes (66) revealed a widespread lack of the T7SS signal in PE35, which extends to its close relatives *M. liflandii* and *M. ulcerans*, suggesting that this variation arose in a common ancestor. Seemingly, new associations between PE and PPE proteins can be formed, which also cautions the interpretation of adjacent PE and PPE genes as necessary secretion partners. Based on available structural data on PE:PPE:EspG complexes and observed molecular weight of the major cytosolic complex, we postulate that the MMAR\_2894:PPE68:EspG<sub>1</sub> complex forms a dimer of trimers. Dimers of EspG<sub>3</sub> from *M. tuberculosis* and *M. smegmatis* have been crystalized, suggesting that dimerization could occur via the chaperone (12, 67).

Overall, our study describes a central role for PPE68 in ESX-1 mediated secretion and function. We hypothesize that PPE68 is in complex together with its PE partner and EspG chaperone in the cytosol as a reservoir to aid in the secretion of other substrates across the inner and possibly also the outer membrane. Further studies should focus on the exact mechanism of co-dependence of substrates for secretion, potential interactions between secreted co-dependent heterodimers and the role of the EccC ATPase in this process. The recent publications of the high-resolution structure of various ESX systems (68–71) will stimulate the field towards a mechanistic understanding of T7SS.

## Material and Methods

**Bacterial strains and culture conditions.** All strains included in this study are listed in Table S2. Mycobacterial strains were routinely grown on Middlebrook 7H10 agar with 10% OADC (Difco) or in Middlebrook 7H9 liquid medium with 10% ADC (Difco) and 0.05% Tween-80. Additional supplement was necessary for culturing of *M. tuberculosis* mc<sup>2</sup>6020 ( $\Delta lysA \Delta panCD$ ), containing 100 ng/ml L-lysine (Sigma) and 25 ng/ml D-pantothenic acid (Sigma). Appropriate antibiotics were added when necessary, i.e. 50 µg/ml kanamycin (Sigma), 50 µg/ml hygromycin (Roche) or 30 µg/ml streptomycin (Sigma). *M. marinum* and *M. tuberculosis* cultures and plates were incubated at 30 °C and 37 °C, respectively. *E. coli* DH5α was used for cloning and was grown on LB agar plates at 37 °C. Antibiotics were added at the same concentrations as described above.

**Plasmid construction.** Genes of interest were amplified from *M. marinum* M or *M. tuberculosis* H37Rv genomic DNA by polymerase chain reaction (PCR) using primers that were synthesized by Sigma (Table S3). Hybrid combinations of genes or introduction of affinity tags were achieved with the use of nested primers. The Phusion polymerase (New England Biolabs, NEB) was used throughout all cloning procedures. Generated constructs were digested with XmnI and HindIII or NheI and BamHI for ligation into pMV361 and pSMT3 vectors (72, 73), respectively. Restrictions and ligation enzymes were provided by New England Biolabs (NEB). All plasmids were verified by Sanger sequencing (Macrogen) and are listed in Table S2.

**Generation of knockout strains and frameshift mutants.** Generation of the *mmar\_5447-50* and *mmar\_0185-88* knockout strains were produced in *M. marinum* M by allelic exchange using a specialized transducing mycobacteriophage as previously described (74). PCR was used to amplify the flanking regions of the genomic regions. Deletions were confirmed by PCR, after which the

selection markers were removed with a temperature sensitive phage encoding the  $\gamma\delta$ -resolvase (TnpR) (a kind gift from Apoorva Bhatt, University of Birmingham, UK). The frameshift (fs) mutants were obtained by genome editing using *Streptococcus thermophilus* CRISPR1-Cas9 (46). Single guide RNAs were produced by the annealing of oligonucleotides containing BsmBI overhangs (75). sgRNA were ligated into BsmBI digested pCRISPRx-Sth1Cas9-L5. The plasmids were sequenced and subsequently electroporated into competent *M. marinum* M cells. Bacteria were plated on 7H10 plates containing kanamycin and 100 ng/ml anhydrotetracycline (ATc, IBA Life sciences) for the induction of the *S. thermophilus* CRISPR1-Cas9 system. Single colonies were picked and screened for mutations in the gene of interest by PCR and sequencing. After verification, the CRISPR1-Cas9 integrative plasmid was removed by exchanging it with pTdTomato-L5 that integrates at the same site.

**RNA isolation and quantitative RT-PCR.** RNA was isolated from bacterial cultures grown to an OD<sub>600</sub> of 1. Bacteria were lysed by bead-beating in the presence of buffer RA-1 (NucleoSpin RNA isolation kit, Mackery-Nagel) and  $\beta$ -mercaptoethanol (Sigma). RNA isolation and purification was continued according to the protocol supplied by the manufacturer (Nucleospin RNA isolation kit, Mackery-Nagel). Samples were eluted in water with Ribolock (Thermoscientific) and an additional DNase treatment was performed with DNaseI (Thermoscientific) according to the protocol supplied by the manufacturer. cDNA was synthesized from 400 ng RNA with the RevertAid First Strand cDNA Synthesis Kit (Thermoscientific). Prior to the PCR reactions the cDNA was diluted 1:10 in RNase free water. Reaction were set up using iTaq Universal SYBR® Green Supermix (Biorad). Quantitative RT-PCR was performed with the QuantStudio™ 3 Real-Time PCR System (ThermoFisher). At the end of amplification, PCR product specificity was verified by melt curve



analysis and agarose gel electrophoresis. The threshold cycle (Ct) values were normalized with the Ct of SigA.

**Protein secretion.** *M. marinum* cultures were grown until mid-logarithmic phase (OD<sub>600</sub> of 1–1.4), before they were washed with 7H9 liquid medium containing 0.2% dextrose and 0.05% Tween-80 to clear the cultures of Bovine Serum Albumin (BSA). Cultures were set at an OD<sub>600</sub> 0.4-0.5 and grown for 16 h. Cells were pelleted (10 min at 3,000xg), washed and resuspended in Phosphate-buffered saline (PBS) before lysing by bead-beating and 1/4<sup>th</sup> volume of 5x SDS loading buffer (312.5 mM Tris-HCl pH 6.8, 10% SDS, 30% glycerol, 500mM DTT and 0.2% bromophenol blue) was added, yielding the pellet fraction. Culture medium was passed through an 0.22-μm filter and proteins were precipitated with Trichloroacetic acid (TCA). TCA precipitated pellets were washed with acetone and resuspended in 1x SDS loading buffer, yielding the supernatant fraction. Alternatively, a fraction of pelleted bacteria was incubated with 0.5% Genapol X-080 in PBS for 30 min with rotation at room temperature to extract cell surface associated proteins. Genapol-treated cells were pelleted, washed and resuspended in PBS before lysis by bead-beating and addition of 1/4<sup>th</sup> volume of 5x SDS buffer, yielding the Genapol pellet fraction. 1/4<sup>th</sup> volume of 5x SDS buffer was also added to Genapol supernatants, yielding the Genapol supernatant fraction. All fractions were boiled for 10 minutes at 95°C before loading on SDS-PAGE gels.

**Fractionation and Strep-tagged protein purification.** Mycobacterial cultures were grown until an OD<sub>600</sub> of 1. Cells were harvested and washed with PBS before resuspension in PBS with 10% glycerol to a concentration of 50-100 OD/ml. Cells were lysed by passage through a One-Shot cell disrupter (Constant Systems) at 0.83 kbar. Unbroken cells were pelleted by centrifugation at 15,000xg for 10 min at 4 °C. The obtained supernatant was subjected to ultracentrifugation at

100,000xg for 1hr at 4 °C, yielding the cell envelope pellet and soluble fractions. Samples were boiled in SDS buffer for 10 minutes at 95°C before loading on SDS-PAGE, as explained above. Alternatively, soluble fractions were then separated under native conditions on a 4–16% NativePage Novex BisTris Protein Gel (Life Technologies) and transferred to a polyvinylidene difluoride (PVDF) membrane before immunostaining.

For the purification of intracellular Strep-tagged proteins, cells were harvested and lysed in buffer B (PBS with 10% glycerol pH 8). Soluble fractions were prepared and incubated with StrepTactin resin (IBA Lifesciences) for 30 min with rotation at 4 °C. Beads were then washed with buffer B and proteins were eluted using buffer B supplemented with 10 mM desthiobiotin (IBA Lifesciences). Samples were taken at each step of the purification and loaded on SDS-PAGE gels to check the efficiency of affinity purification. Elution fractions were also separated under native conditions to ascertain the stability of the complexes after affinity purification.

**Protein detection and sera.** SDS-PAGE and NativePage gels were stained with Brilliant Blue G-250 or R-250 (CBB; Bio-Rad), respectively. Alternatively, proteins were transferred to nitrocellulose (SDS-PAGE) or PVDF (BN-PAGE) membranes. Proteins were visualized using standard immunodetection techniques. Primary antibodies used in this study were anti-GroEL2 (CS44, Colorado state university), anti-PE\_PGRS antibody (7C4.1F7) (76), anti-EsxA (Hyb76-8) (77), polyclonal anti-FtsH (78), polyclonal anti-PPE68 (8), polyclonal anti-EspE (50, 51) and polyclonal anti-Strep (Novusbio).

**Mass spectrometry.** To identify the interaction partners of PPE68, elution fractions of the Strep-tagged protein purifications were analyzed by LC-MS/MS, essentially as described before (79). In short, SDS loading buffer was added to elution samples of Strep-tagged protein purification and

boiled for 10 minutes at 95°C before loading on SDS-PAGE. SDS-PAGE gels were stained by CBB and total protein lanes were excised, washed and processed for in-gel digestion. Peptides were eluted from the gel pieces and analyzed by the Ultimate 3000 nanoLC-MS/MS system (Dionex LC-Packings, Amsterdam, The Netherlands). Proteins were identified from the resulting LC-MS/MS spectra by searching against the Uniprot *M. marinum* complete proteome (ATCC BAA-535M).

**Hemolysis assay.** *M. marinum* strains were grown in 7H9 medium supplemented with ADC and 0.05% Tween 80 until mid-logarithmic phase. All strains were washed with PBS and diluted in Dulbecco's Modified Eagle Medium (DMEM) without phenol red (Gibco, Life technologies). Number of bacteria were quantified by absorbance measurement at OD<sub>600</sub> with an estimation of 2.5x10<sup>8</sup> bacteria in 1 ml of 1.0 OD<sub>600</sub>. Defibrinated sheep erythrocytes (Oxoid-Thermo Fisher, the Netherlands) were washed and diluted in DMEM. A total of 4.15x10<sup>7</sup> erythrocytes and 1.04x10<sup>8</sup> bacteria (1:2.5 ratio) were added for one reaction of 100 µL in a round-bottom 96 well-plate, gently centrifuged for 5 minutes and incubated at 32°C with 5% CO<sub>2</sub>. After 3 hours of incubation, cells were resuspended and centrifuged. Supernatants were transferred to a flat-bottom 96-wells plate and measured at an absorbance of 405 nm to quantify hemoglobin release.

## 543 **Acknowledgements**

544 We would like to thank Roy Ummels, Dagmar van Mourik, Daphne Fluitman and Jobana  
 545 Ananthasabesan for their contributions to plasmid design and the generation of mutants. We are  
 546 grateful to Eric Brown (Genentech) and Roland Brosch (Institut Pasteur) for offering anti-EspE and  
 547 anti-PPE68 antibodies, respectively. This work was funded by the Netherlands Organization of  
 548 Scientific Research through an ALW Open grant (ALWOP.319; to MPMD) and a VIDI grant  
 549 (864.12.006; ENGH). The funders had no role in study design, data collection and analysis,  
 550 decision to publish, or preparation of the manuscript

## References

1. Bayan N, Houssin C, Chami M, Leblon G. 2003. Mycomembrane and S-layer: Two important structures of *Corynebacterium glutamicum* cell envelope with promising biotechnology applications. J Biotechnol 104:55–67.
2. Simeone R, Bobard A, Lippmann J, Bitter W, Majlessi L, Brosch R, Enninga J. 2012. Phagosomal rupture by *Mycobacterium tuberculosis* results in toxicity and host cell death. PLoS Pathog 8:e1002507.
3. van der Wel N, Hava D, Houben D, Fluitsma D, van Zon M, Pierson J, Brenner M, Peters PJ. 2007. *M. tuberculosis* and *M. leprae* translocate from the phagolysosome to the cytosol in myeloid cells. Cell 129:1287–1298.
4. Houben D, Demangel C, van Ingen J, Perez J, Baldeón L, Abdallah AM, Caleechurn L, Bottai D, van Zon M, de Punder K, van der Laan T, Kant A, Bossers-de Vries R, Willemsen P, Bitter W, van Soolingen D, Brosch R, van der Wel N, Peters PJ. 2012. ESX-1-mediated translocation to the cytosol controls virulence of mycobacteria. Cell Microbiol 14:1287–1298.
5. Stamm LM, Morisaki JH, Gao LY, Jeng RL, McDonald KL, Roth R, Takeshita S, Heuser J, Welch MD, Brown EJ. 2003. *Mycobacterium marinum* escapes from phagosomes and is propelled by actin-based motility. J Exp Med 198:1361–1368.
6. Lewis KN, Liao R, Guinn KM, Hickey MJ, Smith S, Behr MA, Sherman DR. 2003. Deletion of RD1 from *Mycobacterium tuberculosis* mimics bacille Calmette-Guérin attenuation. J Infect Dis 187:117–123.

- 572 7. Majlessi L, Brodin P, Brosch R, Rojas M-J, Khun H, Huerre M, Cole ST, Leclerc C. 2005.  
573 Influence of ESAT-6 Secretion System 1 (RD1) of *Mycobacterium tuberculosis* on the  
574 interaction between mycobacteria and the host immune system. J Immunol 174:3570–  
575 3579.
- 576 8. Pym AS, Brodin P, Brosch R, Huerre M, Cole ST. 2002. Loss of RD1 contributed to the  
577 attenuation of the live tuberculosis vaccines *Mycobacterium bovis* BCG and  
578 *Mycobacterium microti*. Mol Microbiol 46:709–717.
- 579 9. Gey Van Pittius NC, Sampson SL, Lee H, Kim Y, Van Helden PD, Warren RM. 2006.  
580 Evolution and expansion of the *Mycobacterium tuberculosis* PE and PPE multigene  
581 families and their association with the duplication of the ESAT-6 (esx) gene cluster  
582 regions. BMC Evol Biol 6:95.
- 583 10. De Jonge MI, Pehau-Arnaudet G, Fretz MM, Romain F, Bottai D, Brodin P, Honoré N,  
584 Marchal G, Jiskoot W, England P, Cole ST, Brosch R. 2007. ESAT-6 from *Mycobacterium*  
585 *tuberculosis* dissociates from its putative chaperone CFP-10 under acidic conditions and  
586 exhibits membrane-lysing activity. J Bacteriol 189:6028–6034.
- 587 11. Korotkova N, Freire D, Phan TH, Ummels R, Creekmore CC, Evans TJ, Wilmanns M, Bitter  
588 W, Parret AHA, Houben ENG, Korotkov K V. 2014. Structure of the *Mycobacterium*  
589 *tuberculosis* type VII secretion system chaperone EspG<sub>5</sub> in complex with PE25-PPE41  
590 dimer. Mol Microbiol 94:367–382.
- 591 12. Ekiert DC, Cox JS, Hultgren SJ. 2014. Structure of a PE-PPE-EspG complex from  
592 *Mycobacterium tuberculosis* reveals molecular specificity of ESX protein secretion. Proc

- 593 Natl Acad Sci U S A 111:14758–14763.
- 594 13. Sysoeva TA, Zepeda-Rivera MA, Huppert LA, Burton BM. 2014. Dimer recognition and  
595 secretion by the ESX secretion system in *Bacillus subtilis*. Proc Natl Acad Sci U S A  
596 111:7653–7658.
- 597 14. Daleke MH, Ummels R, Bawono P, Heringa J, Vandenbroucke-Grauls CMJE, Luirink J,  
598 Bitter W. 2012. General secretion signal for the mycobacterial type VII secretion  
599 pathway. Proc Natl Acad Sci U S A 109:11342–11347.
- 600 15. Strong M, Sawaya MR, Wang S, Phillips M, Cascio D, Eisenberg D. 2006. Toward the  
601 structural genomics of complexes: Crystal structure of a PE/PPE protein complex from  
602 *Mycobacterium tuberculosis*. Proc Natl Acad Sci U S A 103:8060–8065.
- 603 16. Sultana R, Vemula MH, Banerjee S, Guruprasad L. 2013. The PE16 (Rv1430) of  
604 *Mycobacterium tuberculosis* is an esterase belonging to serine hydrolase superfamily of  
605 proteins. PLoS One 8:e55320.
- 606 17. Daleke MH, Cascioferro A, De Punder K, Ummels R, Abdallah AM, Van Der Wel N, Peters  
607 PJ, Luirink J, Manganello R, Bitter W. 2011. Conserved Pro-Glu (PE) and Pro-Pro-Glu (PPE)  
608 protein domains target LipY lipases of pathogenic mycobacteria to the cell surface via the  
609 ESX-5 pathway. J Biol Chem 286:19024–19034.
- 610 18. Burggraaf MJ, Speer A, Meijers AS, Ummels R, Van Der Sar AM, Korotkov K V., Bitter W,  
611 Kuijl C. 2019. Type VII secretion substrates of pathogenic mycobacteria are processed by  
612 a surface protease. MBio 10:e01951-19.
- 613 19. Bunduc CM, Bitter W, Houben ENG. 2020. Structure and Function of the Mycobacterial

Type VII Secretion Systems. Annu Rev Microbiol 74:315–335.

20. Solomonson M, Setiাপutra D, Makepeace KAT, Lameignere E, Petrotchenko E V., Conrady DG, Bergeron JR, Vuckovic M, Dimaio F, Borchers CH, Yip CK, Strynadka NCJ. 2015. Structure of EspB from the ESX-1 type VII secretion system and insights into its export mechanism. Structure 23:571–583.
21. Korotkova N, Piton J, Wagner JM, Boy-Röttger S, Japaridze A, Evans TJ, Cole ST, Pojer F, Korotkov K V. 2015. Structure of EspB, a secreted substrate of the ESX-1 secretion system of *Mycobacterium tuberculosis*. J Struct Biol 191:236–244.
22. Hsu T, Hingley-Wilson SM, Chen B, Chen M, Dai AZ, Morin PM, Marks CB, Padiyar J, Goulding C, Gingery M, Eisenberg D, Russell RG, Derrick SC, Collins FM, Morris SL, King CH, Jacobs WR. 2003. The primary mechanism of attenuation of bacillus Calmette-Guérin is a loss of secreted lytic function required for invasion of lung interstitial tissue. Proc Natl Acad Sci U S A 100:12420–12425.
23. Stanley SA, Raghavan S, Hwang WW, Cox JS. 2003. Acute infection and macrophage subversion by *Mycobacterium tuberculosis* require a specialized secretion system. Proc Natl Acad Sci U S A 100:13001–13006.
24. Gao LY, Guo S, McLaughlin B, Morisaki H, Engel JN, Brown EJ. 2004. A mycobacterial virulence gene cluster extending RD1 is required for cytolysis, bacterial spreading and ESAT-6 secretion. Mol Microbiol 53:1677–1693.
25. Derrick SC, Morris SL. 2007. The ESAT6 protein of *Mycobacterium tuberculosis* induces apoptosis of macrophages by activating caspase expression. Cell Microbiol 9:1547–1555.



26. Smith J, Manoranjan J, Pan M, Bohsali A, Xu J, Liu J, McDonald KL, Szyk A, LaRonde-LeBlanc N, Gao LY. 2008. Evidence for pore formation in host cell membranes by ESX-1-secreted ESAT-6 and its role in *Mycobacterium marinum* escape from the vacuole. *Infect Immun* 76:5478–5487.
27. Peng X, Sun J. 2016. Mechanism of ESAT-6 membrane interaction and its roles in pathogenesis of *Mycobacterium tuberculosis*. *Toxicon* 116:29–34.
28. De Leon J, Jiang G, Ma Y, Rubin E, Fortune S, Sun J. 2012. *Mycobacterium tuberculosis* ESAT-6 exhibits a unique membrane-interacting activity that is not found in its ortholog from non-pathogenic *Mycobacterium smegmatis*. *J Biol Chem* 287:44184–44191.
29. Refai A, Haoues M, Othman H, Barbouche MR, Moua P, Bondon A, Mouret L, Srairi-Abid N, Essafi M. 2015. Two distinct conformational states of *Mycobacterium tuberculosis* virulent factor early secreted antigenic target 6 kDa are behind the discrepancy around its biological functions. *FEBS J* 282:4114–4129.
30. Rangole M, Nehls C, Homolka S, Paulowski L, Vasquez F, Maurer F, Gutschmann T. 2022. The role of mycobacterial ESX-1 secretion systems in phagosome escape. *Biophys J* 121:369a.
31. Conrad WH, Osman MM, Shanahan JK, Chu F, Takaki KK, Cameron J, Hopkinson-Woolley D, Brosch R, Ramakrishnan L. 2017. Mycobacterial ESX-1 secretion system mediates host cell lysis through bacterium contact-dependent gross membrane disruptions. *Proc Natl Acad Sci U S A* 114:1371–1376.
32. Fortune SM, Jaeger A, Sarracino DA, Chase MR, Sasseti CM, Sherman DR, Bloom BR,

- Rubin EJ. 2005. Mutually dependent secretion of proteins required for mycobacterial virulence. *Proc Natl Acad Sci U S A* 102:10676–10681.
33. Xu J, Laine O, Masciocchi M, Manoranjan J, Smith J, Du SJ, Edwards N, Zhu X, Fenselau C, Gao LY. 2007. A unique *Mycobacterium* ESX-1 protein co-secretes with CFP-10/ESAT-6 and is necessary for inhibiting phagosome maturation. *Mol Microbiol* 66:787–800.
34. Champion MM, Williams EA, Pinapati RS, Champion PAD. 2014. Correlation of phenotypic profiles using targeted proteomics identifies mycobacterial Esx-1 substrates. *J Proteome Res* 13:5151–5164.
35. McLaughlin B, Chon JS, MacGurn JA, Carlsson F, Cheng TL, Cox JS, Brown EJ. 2007. A mycobacterium ESX-1-secreted virulence factor with unique requirements for export. *PLoS Pathog* 3:1051–1061.
36. MacGurn JA, Raghavan S, Stanley SA, Cox JS. 2005. A non-RD1 gene cluster is required for Snm secretion in *Mycobacterium tuberculosis*. *Mol Microbiol* 57:1653–1663.
37. DiGiuseppe Champion PA, Champion MM, Manzanillo P, Cox JS. 2009. ESX-1 secreted virulence factors are recognized by multiple cytosolic AAA ATPases in mycobacteria. *Mol Microbiol* 73:950–962.
38. Chen JM, Zhang M, Rybniker J, Boy-Röttger S, Dhar N, Pojer F, Cole ST. 2013. *Mycobacterium tuberculosis* EspB binds phospholipids and mediates EsxA-independent virulence. *Mol Microbiol* 89:1154–1166.
39. Shah S, Briken V. 2016. Modular organization of the ESX-5 secretion system in *Mycobacterium tuberculosis*. *Front Cell Infect Microbiol* 6:1–7.

- 677 40. Tufariello JAM, Chapman JR, Kerantzas CA, Wong KW, Vilchèze C, Jones CM, Cole LE,  
678 Tinaztepe E, Thompson V, Fenyö D, Niederweis M, Ueberheide B, Philips JA, Jacobs WR.  
679 2016. Separable roles for *Mycobacterium tuberculosis* ESX-3 effectors in iron acquisition  
680 and virulence. Proc Natl Acad Sci U S A 113:E348–E357.
- 681 41. Ates LS, Dippenaar A, Ummels R, Piersma SR, Van Der Woude AD, Van Der Kuij K, Le  
682 Chevalier F, Mata-Espinosa D, Barrios-Payán J, Marquina-Castillo B, Guapillo C, Jiménez  
683 CR, Pain A, Houben ENG, Warren RM, Brosch R, Hernández-Pando R, Bitter W. 2018.  
684 Mutations in *ppe38* block PE-PGRS secretion and increase virulence of *Mycobacterium*  
685 *tuberculosis*. Nat Microbiol 3:181–188.
- 686 42. Damen MPM, Phan TH, Ummels R, Rubio-Canalejas A, Bitter W, Houben XENG. 2020.  
687 Modification of a PE/PPE substrate pair reroutes an Esx substrate pair from the  
688 mycobacterial ESX-1 type VII secretion system to the ESX-5 system. J Biol Chem  
689 295:5960–5969.
- 690 43. Phan TH, Ummels R, Bitter W, Houben ENG. 2017. Identification of a substrate domain  
691 that determines system specificity in mycobacterial type VII secretion systems. Sci Rep 7.
- 692 44. Phan TH, van Leeuwen LM, Kuijl C, Ummels R, van Stempvoort G, Rubio-Canalejas A,  
693 Piersma SR, Jiménez CR, van der Sar AM, Houben ENG, Bitter W. 2018. EspH is a  
694 hypervirulence factor for *Mycobacterium marinum* and essential for the secretion of the  
695 ESX-1 substrates EspE and EspF. PLoS Pathog 14:1–36.
- 696 45. Lienard J, Nobs E, Lovins V, Mover E, Valfridsson C, Carlsson F. 2020. The *Mycobacterium*  
697 *marinum* ESX-1 system mediates phagosomal permeabilization and type I interferon

production via separable mechanisms. Proc Natl Acad Sci U S A 117:1160–1166.

46. Meijers AS, Troost R, Ummels R, Maaskant J, Speer A, Nejentsev S, Bitter W, Kuijl CP.

2020. Efficient genome editing in pathogenic mycobacteria using *Streptococcus*

*thermophilus* CRISPR1-Cas9. Tuberculosis 124:101983.

47. Brodin P, De Jonge MI, Majlessi L, Leclerc C, Nilges M, Cole ST, Brosch R. 2005. Functional

analysis of early secreted antigenic target-6, the dominant T-cell antigen of

*Mycobacterium tuberculosis*, reveals key residues involved in secretion, complex

formation, virulence, and immunogenicity. J Biol Chem 280:33953–33959.

48. Bosserman RE, Nguyen TT, Sanchez KG, Chirakos AE, Ferrell MJ, Thompson CR, Champion

MM, Abramovitch RB, Champion PA. 2017. WhiB6 regulation of ESX-1 gene expression is

controlled by a negative feedback loop in *Mycobacterium marinum*. Proc Natl Acad Sci U

S A 114:E10772–E10781.

49. Abdallah AM, Weerdenburg EM, Guan Q, Ummels R, Borggreve S, Adroub SA, Malas TB,

Naeem R, Zhang H, Otto TD, Bitter W, Pain A. 2019. Integrated transcriptomic and

proteomic analysis of pathogenic mycobacteria and their esx-1 mutants reveal secretion-

dependent regulation of ESX-1 substrates and WhiB6 as a transcriptional regulator. PLoS

One 14:1–24.

50. Carlsson F, Joshi SA, Rangell L, Brown EJ. 2009. Polar localization of virulence-related Esx-

1 secretion in mycobacteria. PLoS Pathog 5:e1000285.

51. Sani M, Houben ENG, Geurtsen J, Pierson J, De Punder K, Van Zon M, Wever B, Piersma

SR, Jiménez CR, Daffé M, Appelmeik BJ, Bitter W, Van Wel N Der, Peters PJ. 2010. Direct

visualization by Cryo-EM of the mycobacterial capsular layer: A labile structure  
containing ESX-1-secreted proteins. PLoS Pathog 6:e1000794.

52. Van Winden VJCC, Ummels R, Piersma SR, Jiménez CR, Korotkov K V., Bitter W, Houben  
ENGG, Jimenez CR, Korotkov K V., Bitter W, Houben ENGG. 2016. Mycosins are required  
for the stabilization of the ESX-1 and ESX-5 type VII secretion membrane complexes.  
MBio 7:1–11.

53. Brodin P, Majlessi L, Marsollier L, De Jonge MI, Bottai D, Demangel C, Hinds J, Neyrolles  
O, Butcher PD, Leclerc C, Cole ST, Brosch R. 2006. Dissection of ESAT-6 system 1 of  
*Mycobacterium tuberculosis* and impact on immunogenicity and virulence. Infect Immun  
74:88–98.

54. Williamson ZA, Chaton CT, Ciocca WA, Korotkova N, Korotkov K V. 2020. PE5–PPE4–EspG<sub>3</sub>  
heterotrimer structure from mycobacterial ESX-3 secretion system gives insight into  
cognate substrate recognition by ESX systems. J Biol Chem 295:12706–12715.

55. Bunduc CM, Ummels R, Bitter W, Houben ENG. 2020. Species-specific secretion of ESX-5  
type VII substrates is determined by the linker 2 of EccC<sub>5</sub>. Mol Microbiol 114:66–76.

56. DiGiuseppe Champion PA, Stanley SA, Champion MM, Brown EJ, Cox JS. 2006. C-terminal  
signal sequence promotes virulence factor secretion in *Mycobacterium tuberculosis*.  
Science (80- ) 313:1632–1636.

57. Rosenberg OS, Dovala D, Li X, Connolly L, Bendebury A, Finer-Moore J, Holton J, Cheng Y,  
Stroud RM, Cox JS. 2015. Substrates control multimerization and activation of the multi-  
domain ATPase motor of type VII secretion. Cell 161:501–512.

- 740 58. Wang S, Zhou K, Yang X, Zhang B, Zhao Y, Xiao Y, Yang X, Yang H, Guddat LW, Li J, Rao Z.  
741 2020. Structural insights into substrate recognition by the type VII secretion system.  
742 Protein Cell 11:124–137.
- 743 59. Sorensen AL, Nagai S, Houen G, Andersen P, Andersen AB. 1995. Purification and  
744 characterization of a low-molecular-mass T-cell antigen secreted by *Mycobacterium*  
745 *tuberculosis*. Infect Immun 63:1710–1717.
- 746 60. Andersen P, Andersen AB, Sørensen AL, Nagai S. 1995. Recall of long-lived immunity to  
747 *Mycobacterium tuberculosis* infection in mice. J Immunol 154:3359–72.
- 748 61. Ulrichs T, Munk ME, Mollenkopf H, Behr-Perst S, Colangeli R, Gennaro ML, Kaufmann  
749 SHE. 1998. Differential T cell responses to *Mycobacterium tuberculosis* ESAT6 in  
750 tuberculosis patients and healthy donors. Eur J Immunol 28:3949–3958.
- 751 62. Demangel C, Brodin P, Cockle PJ, Brosch R, Majlessi L, Leclerc C, Cole ST. 2004. Cell  
752 envelope protein PPE68 contributes to *Mycobacterium tuberculosis* RD1 immunogenicity  
753 independently of a 10-Kilodalton Culture Filtrate Protein and ESAT-6. Infect Immun  
754 72:2170–2176.
- 755 63. Sassetti CM, Rubin EJ. 2003. Genetic requirements for mycobacterial survival during  
756 infection. Proc Natl Acad Sci U S A 100:12989–12994.
- 757 64. Cronin RM, Ferrell MJ, Clare WC, Matthew MC, Patricia AC. 2022. Proteo-genetic analysis  
758 reveals clear hierarchy of ESX-1 secretion in *Mycobacterium marinum*. Proc Natl Acad Sci  
759 119:e2123100119.
- 760 65. Bosserman RE, Nicholson KR, Champion MM, Champion PA. 2019. A new ESX-1 Substrate

in *Mycobacterium marinum* that is required for hemolysis but not host cell lysis. J

Bacteriol 201:1–16.

66. Das S, Pettersson BMF, Behra PRK, Mallick A, Cheramie M, Ramesh M, Shirreff L, DuCote T, Dasgupta S, Ennis DG, Kirsebom LA. 2018. Extensive genomic diversity among *Mycobacterium marinum* strains revealed by whole genome sequencing. Sci Rep 8:1–15.

67. Tuukkanen A, Freire D, Chan S, Arbing M, Reed R, Evans T, Zenkeviciute G, Kim J, Kahng S, Sawaya M, Chaton C, Wilmanns M, Eisenberg D, Parret A, Korotkov K. 2018. Structural variability of EspG chaperones from mycobacterial ESX-1, ESX-3 and ESX-5 type VII secretion systems. Struct Var EspG Chaperones from Mycobact ESX-1, ESX-3, ESX-5 Type VII Secret Syst 250803.

68. Famelis N, Rivera-Calzada A, Degliesposti G, Wingender M, Mietrach N, Skehel JM, Fernandez-Leiro R, Böttcher B, Schlosser A, Llorca O, Geibel S. 2019. Architecture of the mycobacterial type VII secretion system. Nature 576:321–325.

69. Poweleit N, Czudnochowski N, Nakagawa R, Trinidad D, Murphy KC, Sassetti C, Rosenberg OS. 2019. The structure of the endogenous ESX-3 secretion system. Elife 8:e52983.

70. Beckham KSH, Ritter C, Chojnowski G, Ziemianowicz DS, Mullapudi E, Rettel M, Savitski MM, Mortensen SA, Kosinski J, Wilmanns M. 2021. Structure of the mycobacterial ESX-5 type VII secretion system pore complex. Sci Adv 7.

71. Bunduc CM, Fahrenkamp D, Wald J, Ummels R, Bitter W, Houben ENG, Marlovits TC. 2021. Structure and dynamics of a mycobacterial type VII secretion system. Nature 593:445–448.

- 782 72. Stover CK, De La Cruz VF, Fuerst TR, Burlein JE, Benson LA, Bennett LT, Bansal GP, Young  
783 JF, Lee MH, Hatfull GF, Snapper SB, Barletta RG, Jacobs WR, Bloom BR. 1991. New use of  
784 BCG for recombinant vaccines. *Nature* 351:456–460.
- 785 73. Hayward CM, O’Gaora P, Young DB, Griffin GE, Thole J, Hirst TR, Castello-Branco LR, Lewis  
786 DJ. 1999. Construction and murine immunogenicity of recombinant Bacille Calmette  
787 Guérin vaccines expressing the B subunit of *Escherichia coli* heat labile enterotoxin.  
788 *Vaccine* 17:1272–1281.
- 789 74. Bardarov S, Bardarov S, Bardarov S, Bardarov S, Pavelka MS, Pavelka MS,  
790 Sambandamurthy V, Sambandamurthy V, Larsen M, Larsen M, Tufariello J, Tufariello J,  
791 Chan J, Chan J, Hatfull G, Hatfull G, Jacobs WR, Jacobs WR. 2002. Specialized  
792 transduction : an efficient method for generating marked and unmarked targeted gene  
793 disruptions in *Mycobacterium tuberculosis*, *M. bovis* BCG and *M. smegmatis*.  
794 *Microbiology* 148:3007–3017.
- 795 75. Rock JM, Hopkins FF, Chavez A, Diallo M, Chase MR, Gerrick ER, Pritchard JR, Church GM,  
796 Rubin EJ, Sasseti CM, Schnappinger D, Fortune SM. 2017. Programmable transcriptional  
797 repression in mycobacteria using an orthogonal CRISPR interference platform. *Nat*  
798 *Microbiol* 2:1–9.
- 799 76. Abdallah AM, Verboom T, Weerdenburg EM, Gey Van Pittius NC, Mahasha PW, Jiménez  
800 C, Parra M, Cadieux N, Brennan MJ, Appelmelk BJ, Bitter W. 2009. PPE and PE-PGRS  
801 proteins of *Mycobacterium marinum* are transported via the type VII secretion system  
802 ESX-5. *Mol Microbiol* 73:329–340.



77. Harboe M, Malin AS, Dockrell HS, Wiker HG, Ulvund G, Holm A, Jørgensen MC, Andersen P. 1998. B-cell epitopes and quantification of the ESAT-6 protein of *Mycobacterium tuberculosis*. Infect Immun 66:717–723.
78. van Bloois E, Dekker HL, Fröderberg L, Houben ENG, Urbanus ML, de Koster CG, de Gier JW, Luirink J. 2008. Detection of cross-links between FtsH, YidC, HflK/C suggests a linked role for these proteins in quality control upon insertion of bacterial inner membrane proteins. FEBS Lett 582:1419–1424.
79. Ates LS, Ummels R, Commandeur S, van der Weerd R, Sparrius M, Weerdenburg E, Alber M, Kalscheuer R, Piersma SR, Abdallah AM, Abd El Ghany M, Abdel-Haleem AM, Pain A, Jiménez CR, Bitter W, Houben ENG. 2015. Essential role of the ESX-5 secretion system in outer membrane permeability of pathogenic mycobacteria. PLoS Genet 11:e1005190.
80. Abdallah AM, Verboom T, Hannes F, Safi M, Strong M, Eisenberg D, Musters RJP, Vandenbroucke-Grauls CMJE, Appelmelk BJ, Luirink J, Bitter W. 2006. A specific secretion system mediates PPE41 transport in pathogenic mycobacteria. Mol Microbiol 62:667–679.
81. Sambandamurthy VK, Derrick SC, Jalapathy K V., Chen B, Russell RG, Morris SL, Jacobs WR. 2005. Long-term protection against tuberculosis following vaccination with a severely attenuated double lysine and pantothenate auxotroph of *Mycobacterium tuberculosis*. Infect Immun 73:1196–1203.

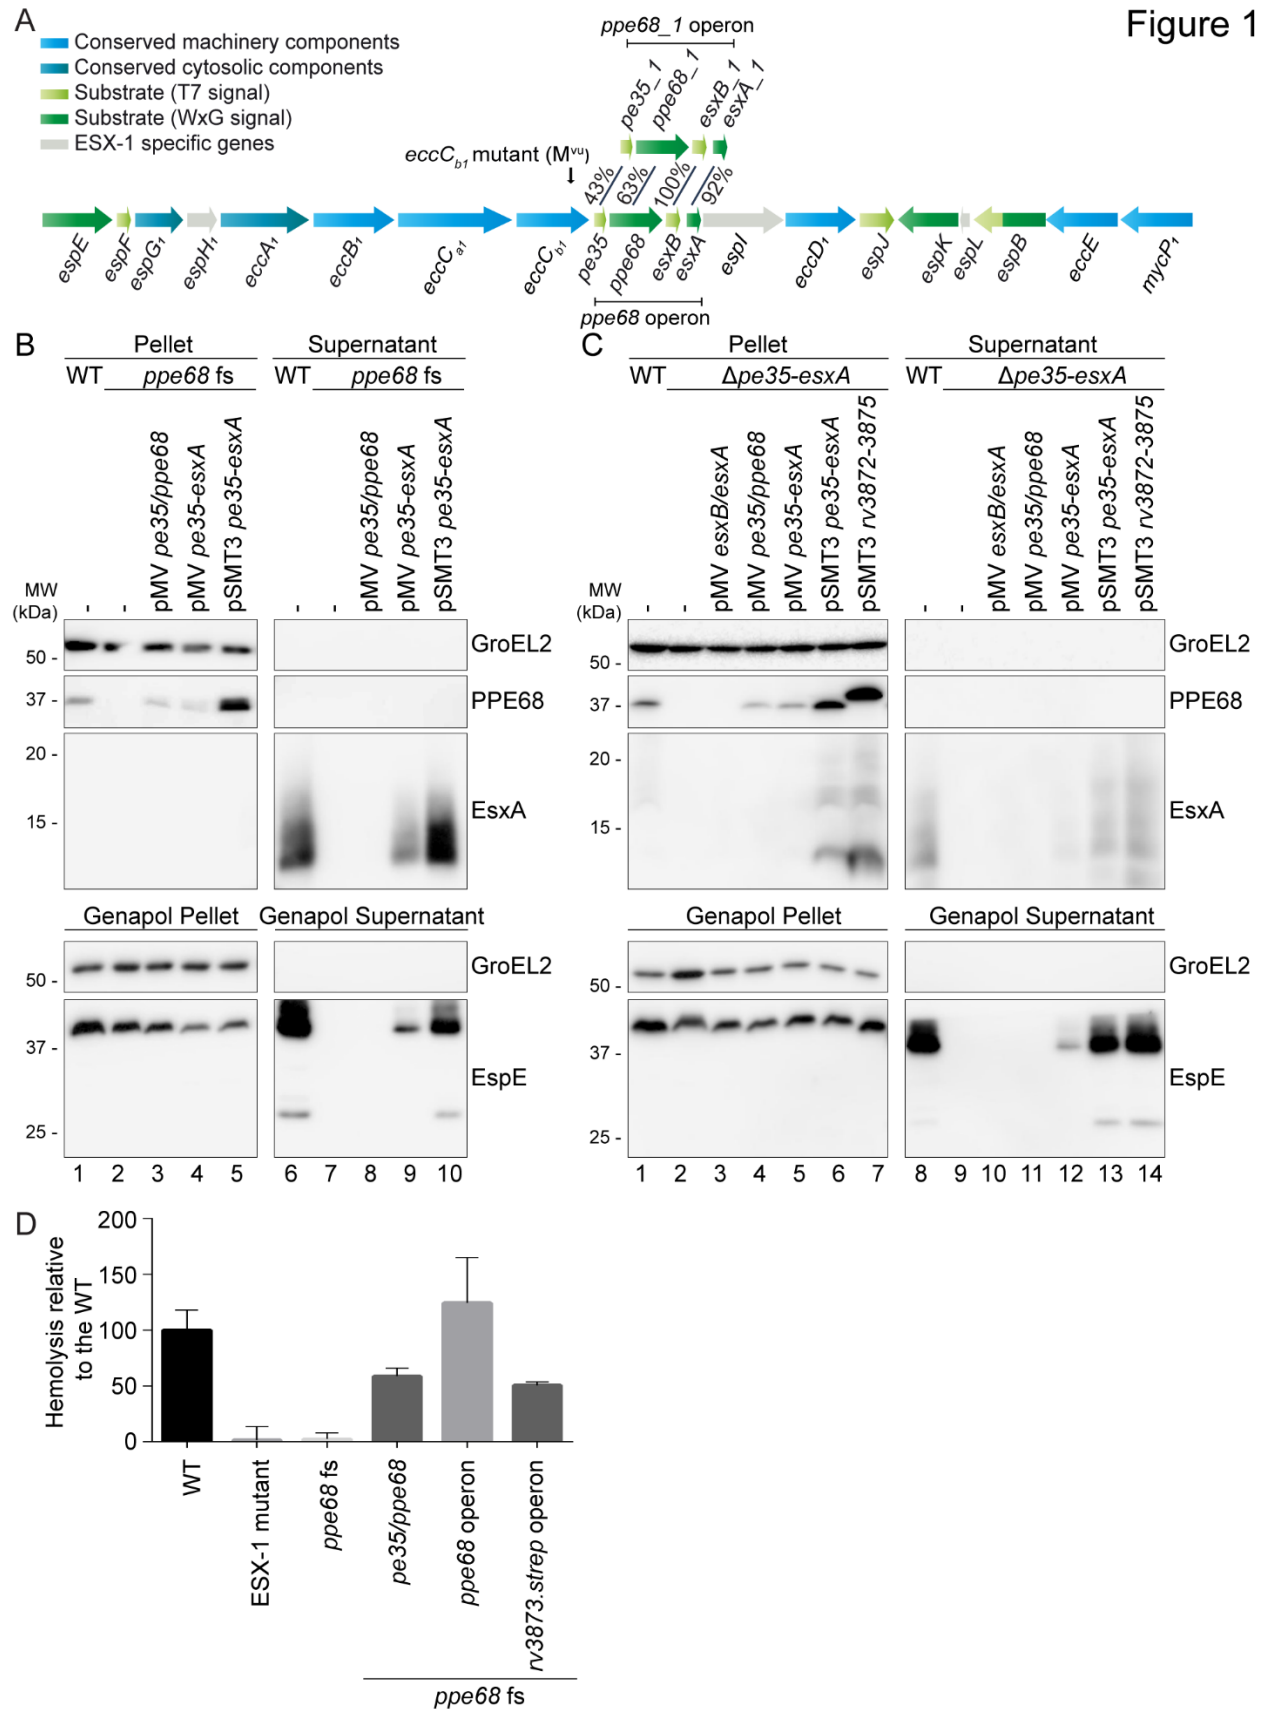

**Figure 1. *pe35/ppe68* is necessary for secretion of ESX-1 substrates EsxA and EspE, and is required for ESX-1 mediated hemolysis.** A) Schematic overview of the *esx-1* gene cluster and its paralogous region. Genes are color-coded to their subcellular localization (key color). Notably, the *pe* gene upstream of *ppe68\_1* was originally named *pe35*, while the paralogous gene upstream of *ppe68* in the *esx-1* locus was named *mmar\_5447*. In this study, we renamed these two genes *pe35\_1* and *pe35*, respectively. B, C) SDS-PAGE and immunostaining of the cell pellet, culture supernatant, Genapol pellet and Genapol supernatant fractions of *M. marinum* M wild type (WT) and the *ppe68* fs mutant without and with various complementation constructs (B) or WT and the *ppe68* operon mutant ( $\Delta pe35$ -*esxA*) with and without various complementation constructs (C). Genes were expressed from an integrative pMV vector or a multicopy pSMT3 vector under control of the *hsp60* promoter. In B) the WT, *ppe68* fs mutant and the *ppe68* fs mutant containing a pSMT3 vector also contained a pMV TdTomato plasmid. Proteins were visualized with anti-EsxA, anti-EspE, and anti-PPE68 antibodies (ESX-1 substrates). A processed band of 25 kDa was detected by the anti-EspE antibody in the Genapol supernatant fraction of the WT, which has been reported before (44). As a loading and lysis control, blots were incubated with antibodies directed against the cytosolic GroEL2 protein. In all blots, equivalent OD units were loaded: 0.2 OD for pellet and Genapol pellet and 0.4 OD for supernatant and Genapol supernatant fractions. D) Hemoglobin release after incubation of sheep red blood cells with *M. marinum* WT, an ESX-1 mutant (*eccC<sub>b1</sub>* mutant; M<sup>VU</sup>), the *ppe68* fs mutant, and the *ppe68* fs mutant complemented with either the entire *ppe68* operon of *M. marinum*, with only *pe35/ppe68*, or with the *ppe68* operon of *M. tuberculosis* (*rv3872-rv3875*). Hemoglobin release was quantified by determining the OD<sub>450</sub> of the medium after incubation.

Figure 2

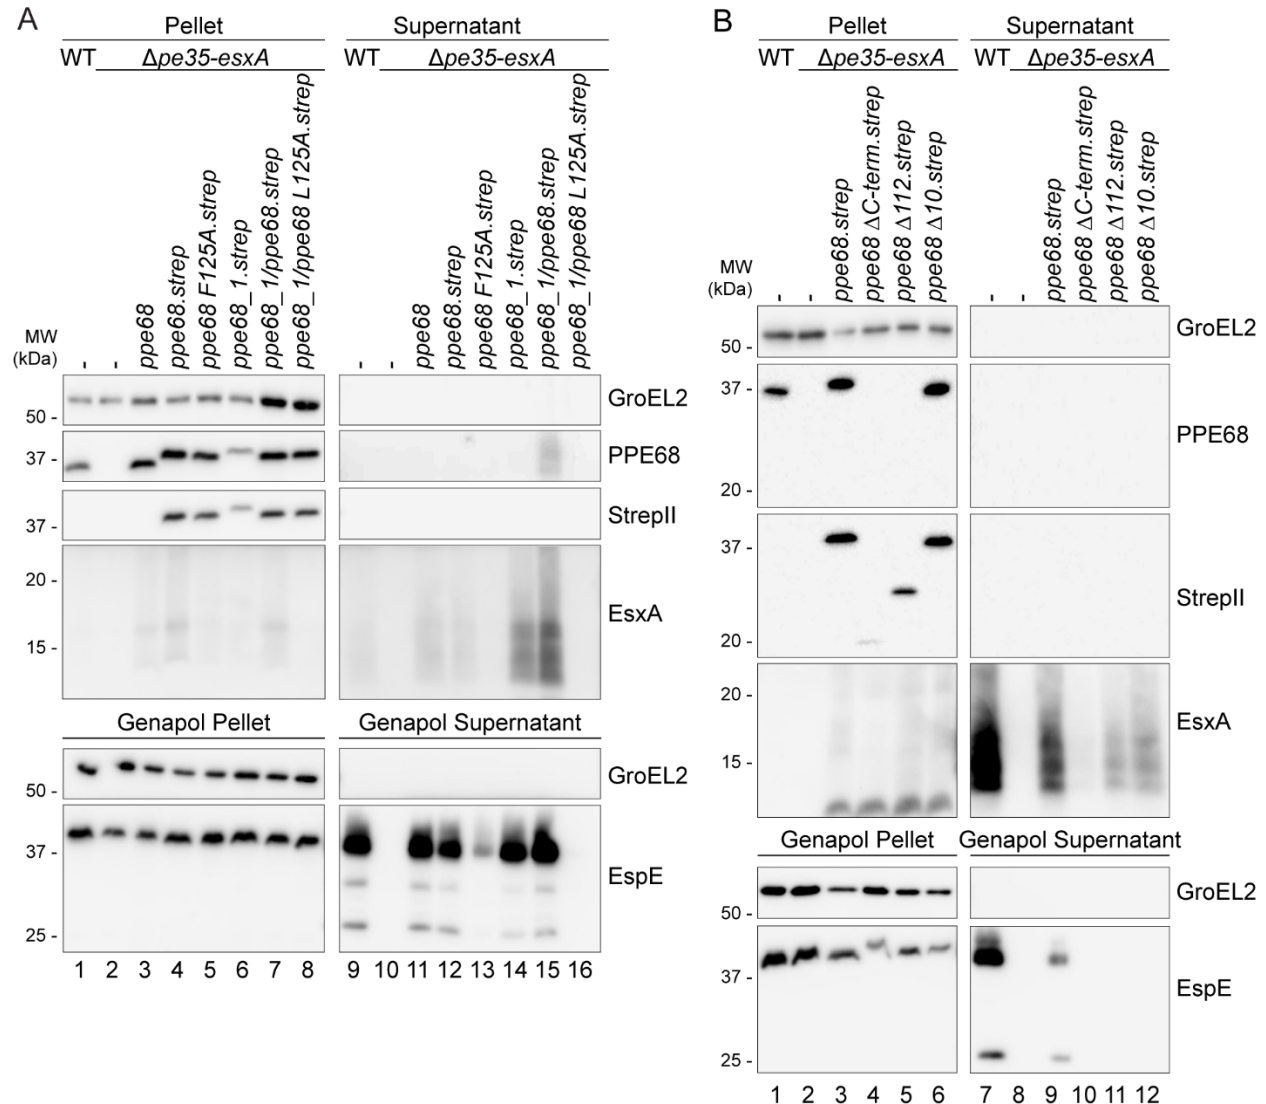

**Figure 2. Conserved features of PPE68 are important for its central role in ESX-1 secretion. A)**

The role of the EspG<sub>1</sub>-binding domain of PPE68. SDS-PAGE and immunostaining of the cell pellet, culture supernatant, Genapol pellet and Genapol supernatant fractions of *M. marinum* WT, the *ppe68* operon mutant ( $\Delta pe35-esxA$ ) and the *ppe68* operon mutant complemented with either the *ppe68* operon, the *ppe68\_1* operon, or with a hybrid operon containing *pe35\_1*, the N-terminal domain of *ppe68\_1*, the C-terminal domain of *ppe68*, *esxB* and *esxA*. Single amino acid

853 substitutions were made in the helical tip of PPE68 and the PPE68\_1/PPE68 hybrid to investigate  
854 the role of the EspG<sub>1</sub>-binding domain. B) The role of the C-terminal domain of PPE68. SDS-PAGE  
855 and immunostaining of the cell pellet, culture supernatant, Genapol pellet and Genapol  
856 supernatant fractions of *M. marinum* WT, the *ppe68* operon mutant ( $\Delta pe35-esxA$ ), and the *ppe68*  
857 operon mutant complemented with either the WT or *ppe68* operon variants, encoding PPE68  
858 lacking either the entire (PPE68 $\Delta$ C-term) or partial, i.e. the final 112 (PPE68 $\Delta$ 112) or 10  
859 (PPE68 $\Delta$ 10) amino acids, C-terminal domain. In both A) and B), the operons were expressed from  
860 a multicopy pSMT3 vector under control by the *hsp60* promotor and with a Strep-tag on the C-  
861 terminus of PPE68 and its variants. Proteins were visualized with anti-EsxA, anti-EspE, anti-StrepII  
862 (PPE68) and anti-PPE68 antibodies (ESX-1 substrates). A processed band of 25 kDa was detected  
863 by the anti-EspE antibody in the Genapol supernatant fraction of the WT, which has been  
864 reported before (44). As a loading and lysis control, blots were incubated with antibodies directed  
865 against the cytosolic GroEL2 protein. In all blots, equivalent OD units were loaded: 0.2 OD for  
866 pellet and Genapol pellet and 0.4 OD for supernatant and Genapol supernatant fractions.

Figure 3

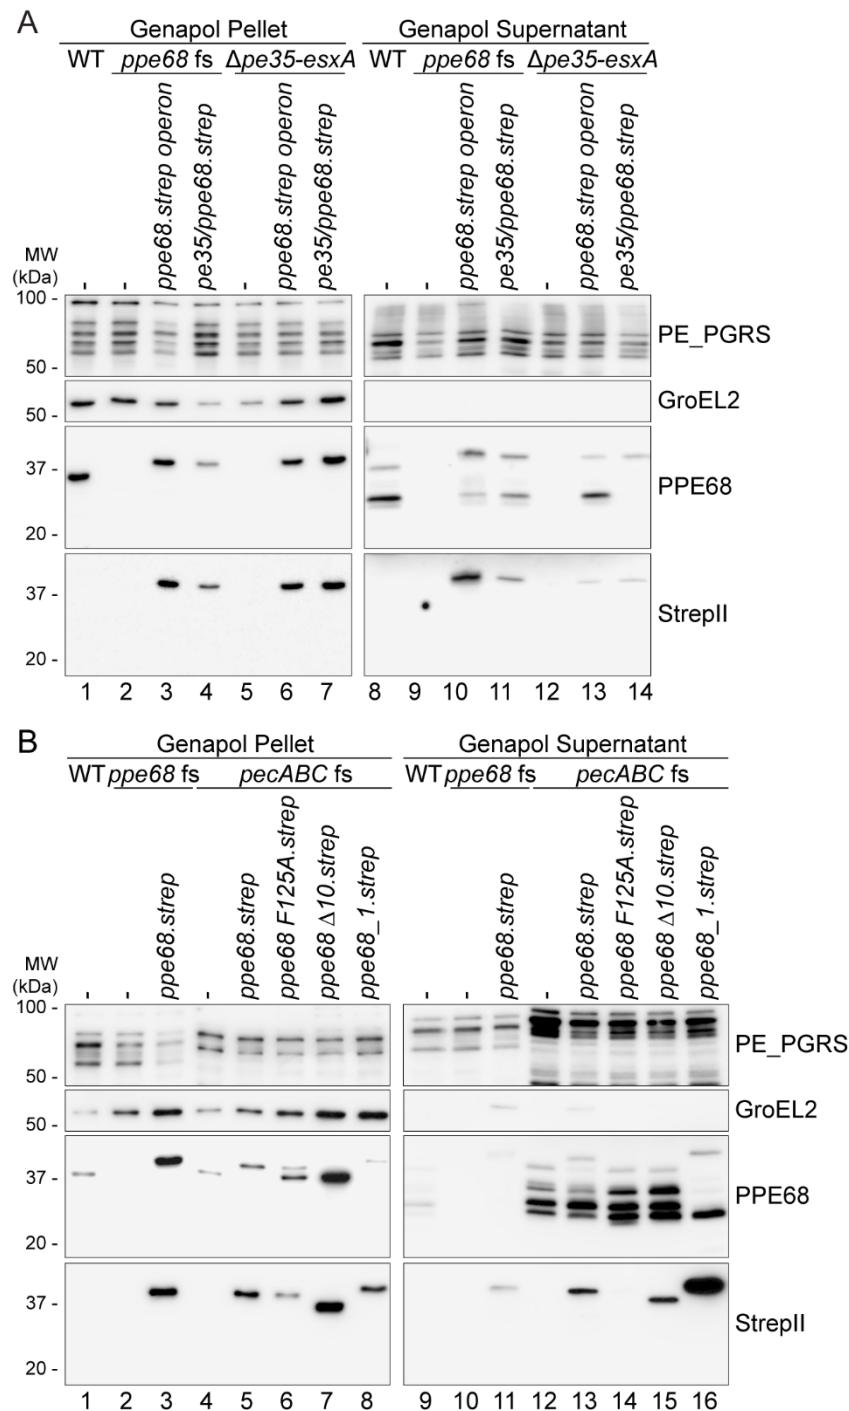

**Figure 3. PPE68 is secreted independently of *esxB/esxA* and processed on the cell surface of *M.***

***marinum*.** A) SDS-PAGE and immunostaining on Genapol pellet and concentrated Genapol

supernatant fractions of *M. marinum* WT, the *ppe68* fs mutant, the *ppe68* operon mutant and

both mutants complemented with *pe35/ppe68* or the entire *ppe68* operon. B) Additional SDS-PAGE and immunostaining of Genapol pellet and concentrated Genapol supernatant fractions of the *pecABC* fs mutant overexpressing the WT *ppe68* operon (*ppe68.strep*), the operon producing either the PPE68F125A with an amino acid substitution in the helical tip, or PPE68 $\Delta$ 10 with a C-terminal truncation of the last 10 amino acids, or the *ppe68\_1* operon (*ppe68\_1.strep*). Operons were expressed from a multicopy pSMT3 vector controlled by the *hsp60* promoter and with a Strep-tag on the C-terminus of PPE68 and the variants. Proteins were visualized with anti-StrepII (PPE68) and anti-PPE68 antibodies (ESX-1 substrates). All *ppe68* fs and *pecABC* fs mutants contain an additional pMV TdTomato plasmid. As a loading and lysis control, blots were incubated with antibodies directed against the cytosolic GroEL2 protein and the surface-localized PE\_PGRS proteins. In all blots, equivalent OD units were loaded: 0.2 OD for Genapol pellet and 2 OD Genapol supernatant fractions.

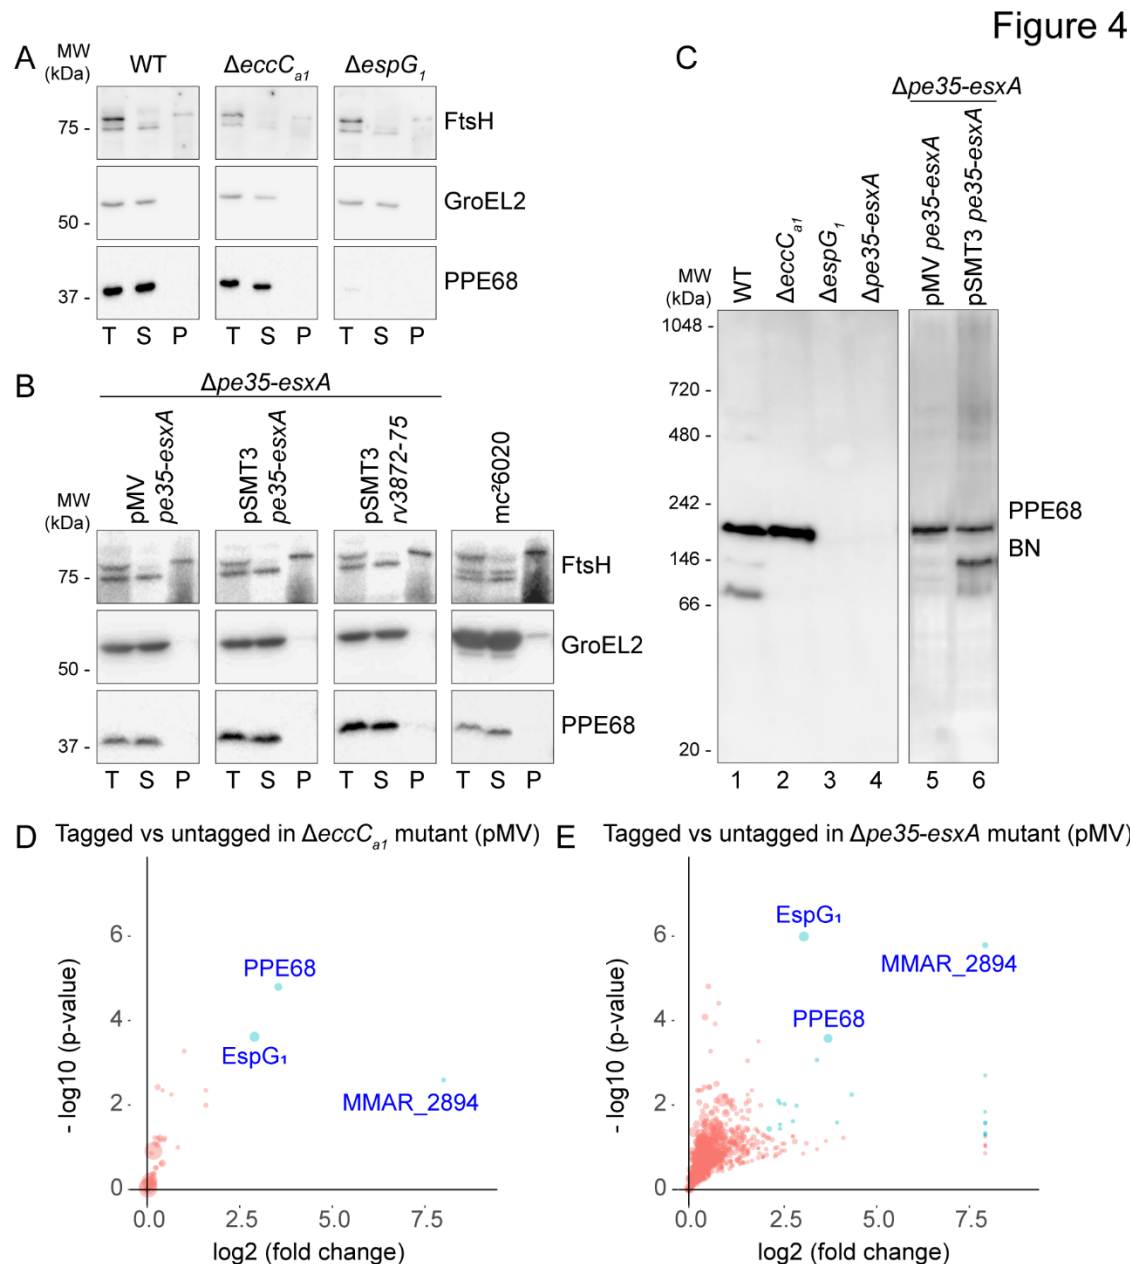

**Figure 4. PPE68 of *M. marinum* and *M. tuberculosis* is soluble and forms complexes of different sizes.** A,B) SDS-PAGE and immunostaining of subcellular fractionation of *M. marinum* WT, an *eccC<sub>a1</sub>* mutant and an *espG<sub>1</sub>* mutant (A) and the *ppe68* operon mutant complemented with the *ppe68* operon of *M. marinum* expressed from a pMV or pSMT3 vector, or the *ppe68* operon of *M. tuberculosis* H37Rv expressed from a pSMT3 vector, and the auxotrophic *M. tuberculosis*



*strain mc<sup>2</sup>6020* (B). Proteins were visualized with anti-PPE68, while antibodies against GroEL2 (cytosolic protein) and FtsH (membrane protein) were used to assess the purity of the fractions. Notably, the FtsH antiserum cross-reacts with a cytosolic protein. In all blots, equivalent amounts corresponding to 0.2 OD units were loaded. T, total lysate, S, supernatant/soluble proteins, P, pellet/cell envelope proteins. C) Immunostaining of soluble fractions of the same strains as in A) and B) after blue native PAGE (BN-PAGE) gel electrophoresis. In all blots, equivalent amounts of 19 µg of total protein was loaded. D,E) PPE68 interacts with its PE partner, MMAR\_2894, and the EspG<sub>1</sub> chaperone in the cytosol. Quantitative proteomics analysis comparing the PPE68 affinity purification from the soluble fraction of the *eccC<sub>α1</sub>* mutant (D) and the *ppe68* operon mutant (E), complemented with the *ppe68* operon, producing PPE68 with or without a Strep-tag on its C-terminus from a pMV vector. Proteins that show log<sub>2</sub> fold change > 2 and a -log<sub>10</sub> p-value > 1.3 between tagged and untagged PPE68 are indicated as blue dots. Size of the dots are correlated to the number of spectral counts.

Figure 5

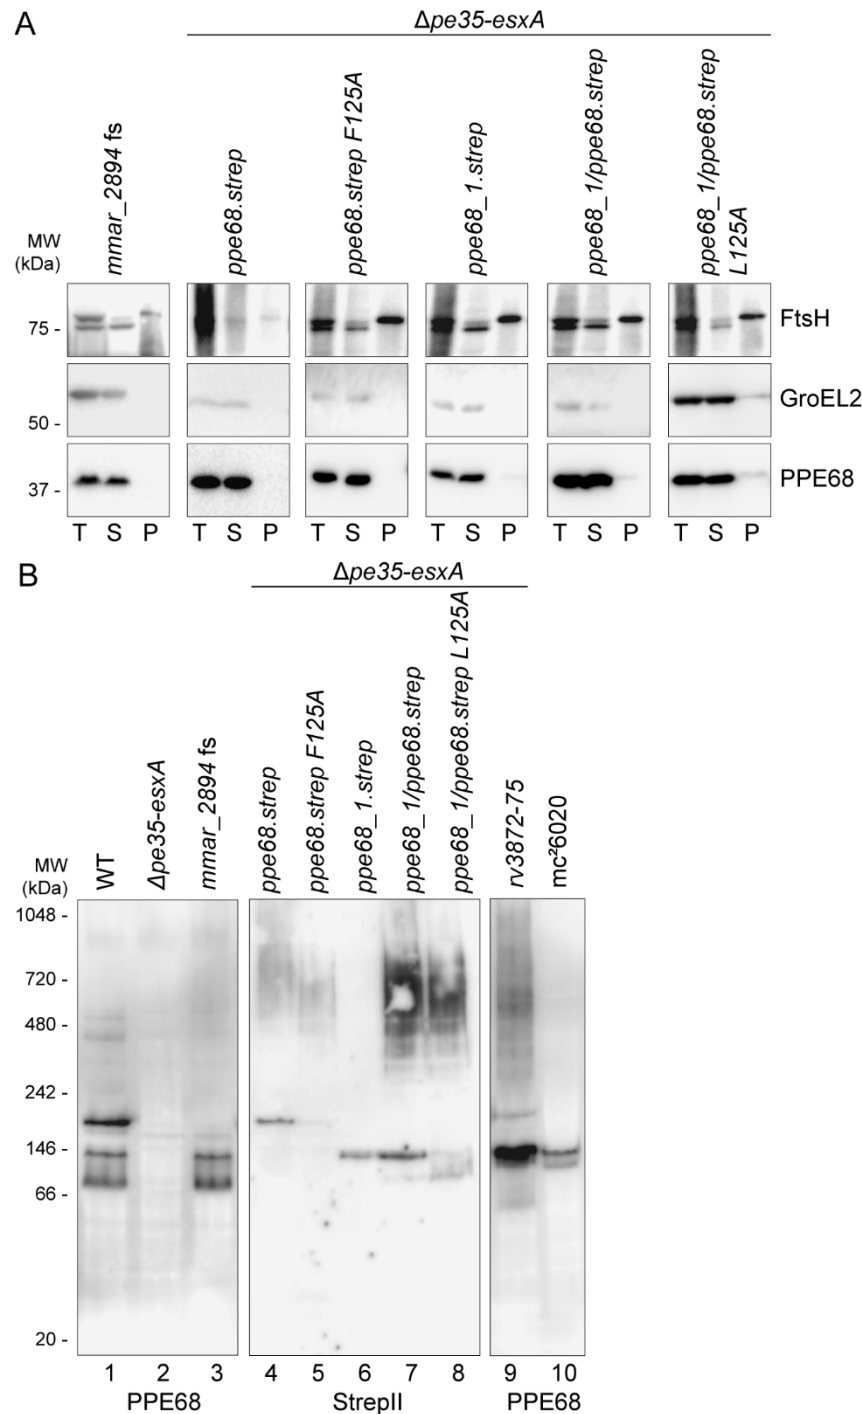

**Figure 5. Verification of complex formation of PPE68 with MMAR\_2894 and EspG<sub>1</sub>.** A) SDS-PAGE and immunostaining of subcellular fractions of the *mmr\_2894* fs mutant and the *ppe68* operon mutant complemented with the WT *ppe68* operon, the *ppe68\_1* operon, a hybrid operon

containing *pe35\_1*, the N-terminal domain of *ppe68\_1*, the C-terminal domain of *ppe68* and *esxB* and *esxA* or the *ppe68* or hybrid operon expressing a PPE68 variant with a single amino acid substitution at position 125. Genes were expressed from a multicopy pSMT3 vector under the *hsp60* promoter with a Strep-tag on the C-terminus of PPE68 or its variants. Proteins were visualized with anti-PPE68 antibodies, while antibodies against GroEL2 (cytosolic protein) and FtsH (membrane protein) were used to assess the purity of the fractions. Notably, the FtsH antiserum cross-reacts with a cytosolic protein. In all blots, equivalent amounts corresponding to 0.2 OD units were loaded. T, total lysate, S, supernatant/soluble proteins, P, pellet/cell envelope proteins. B) BN-PAGE and immunostaining of soluble fractions of the same strains as in A, and also the *ppe68* operon mutant expressing the *ppe68* operon of *M. tuberculosis* from a pSMT3 vector and the auxotrophic *M. tuberculosis* strain mc<sup>2</sup>6020. Proteins were visualized with anti-PPE68 and anti-StrepII antibodies. In all blots, equivalent amounts of 19 µg of total protein was loaded.





mutant ( $M^{VU}$ ), the *ppe68* fs mutant and the *ppe68* fs mutant complemented with *pe35/ppe68* expressed from the pMST3 vector, compared to the WT. Cycle threshold (Ct) values were normalized for Ct values of the household gene *sigA* and compared to the Ct values. D) SDS-PAGE and immunostaining of the cell pellet, culture supernatant, Genapol pellet and Genapol supernatant fractions of *M. marinum* WT, the *ppe68* fs mutant with and without various a complementation constructs and the *ppe68* operon mutant ( $\Delta pe35-esxA$ ) with and without various complementation constructs. Genes were expressed from a multicopy pSMT3 vector under control of the *hsp60* promoter with a Strep-tag on the C-terminus of PPE68. The WT, the *ppe68* fs mutant and the *ppe68* fs mutant containing the pSMT3 vectors also contained a pMV TdTomato plasmid. Proteins were visualized with anti-EsxA and anti-EspE (ESX-1 substrates) antibodies. As a loading and lysis control, blots were incubated with antibodies directed against the cytosolic GroEL2 protein. In all blots, equivalent OD units were loaded: 0.2 OD for pellet and Genapol pellet fractions, 1.2 OD for supernatant fractions and 2 OD for Genapol supernatant fractions.

Figure S2

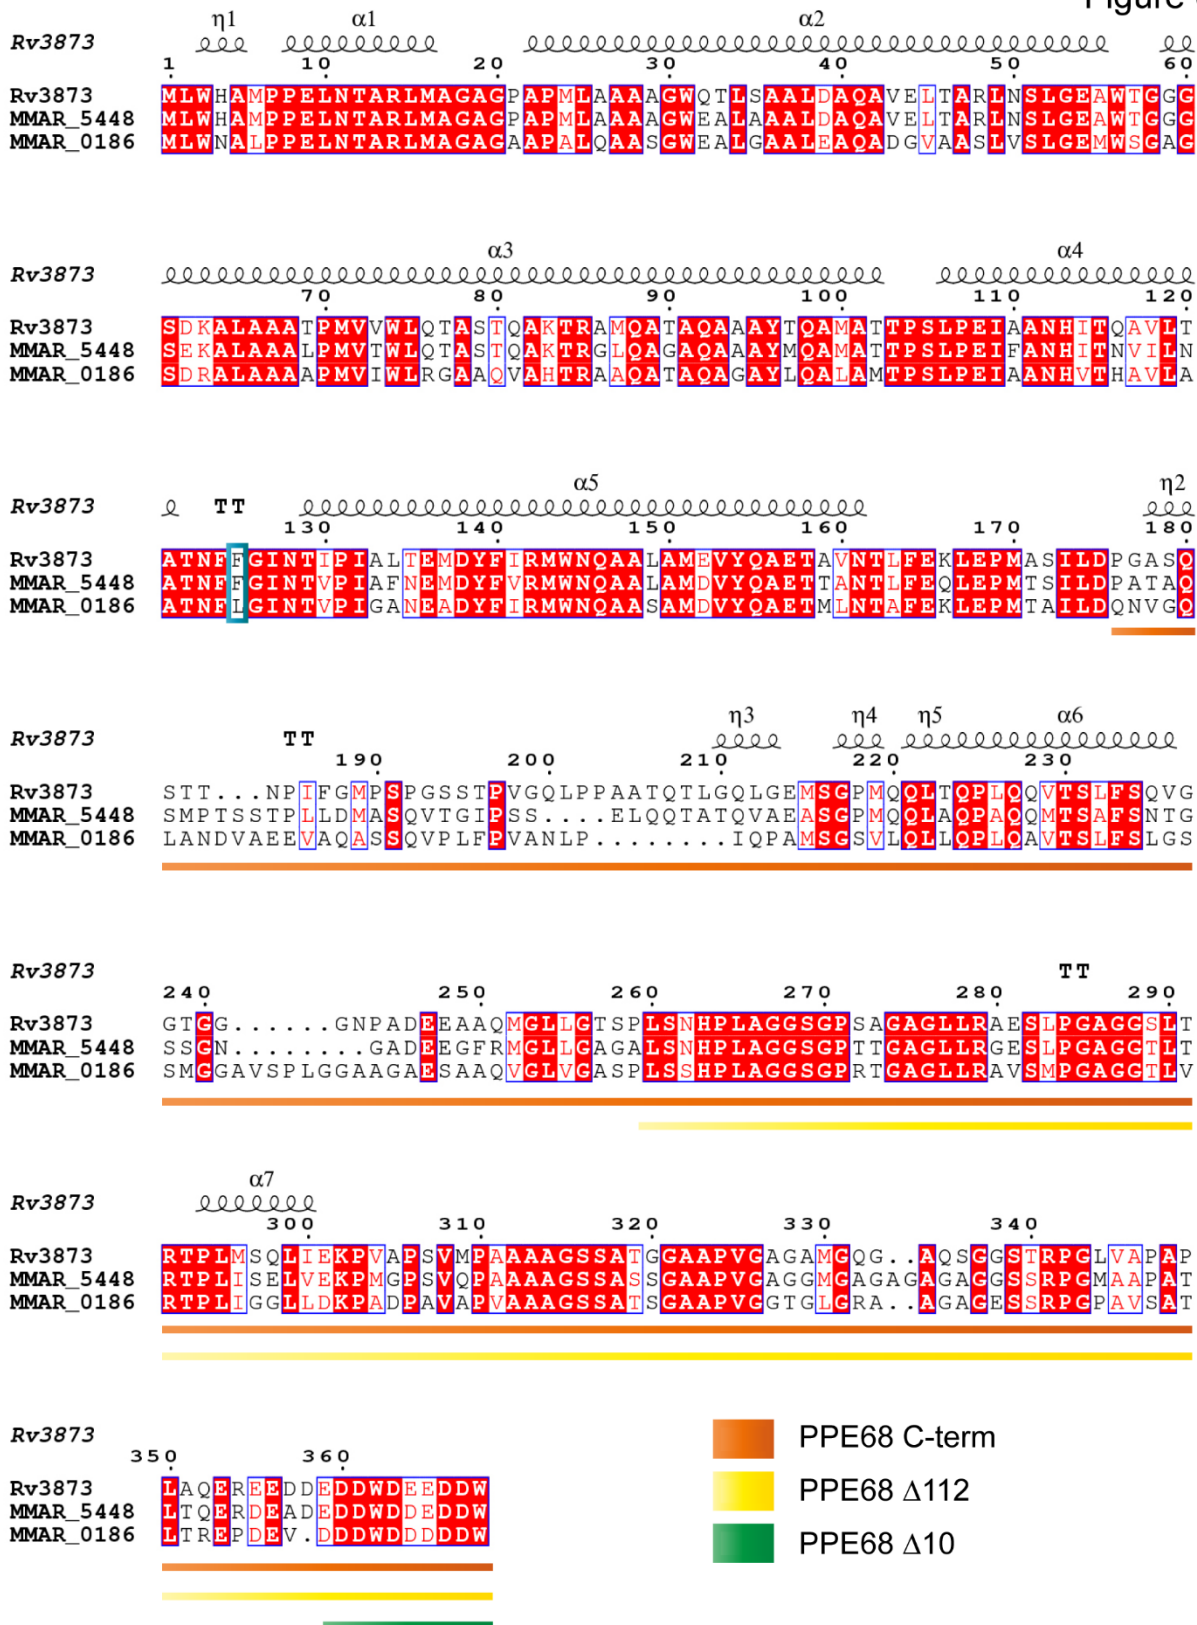

948 **Figure S2. Protein sequence alignment of PPE68 homologs of *M. marinum* and *M. tuberculosis***  
 949 **including the secondary structure prediction of *M. tuberculosis* PPE68.** The secondary structure  
 950 prediction was produced by Alphafold. The blue square indicates the residue at position 125  
 951 involved in EspG<sub>1</sub>-binding. Underlined sequences indicate the C-terminal truncations according  
 952 to the color key. Rv3873 = PPE68 of *M. tuberculosis*, MMAR\_5448 = PPE68 of *M. marinum* and  
 953 MMAR\_0186 = PPE68\_1 of *M. marinum*.

954



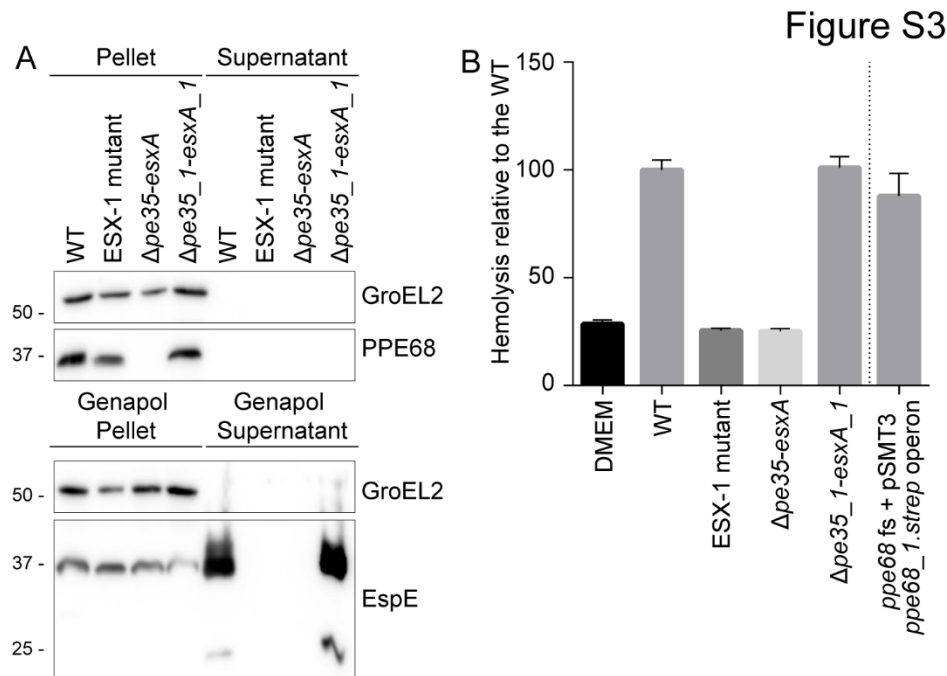

**Figure S3. Deletion of the paralogous *ppe68\_1* operon does not affect EspE secretion or hemolytic activity of *M. marinum*.** A) SDS-PAGE and immunostaining was performed on the cell pellet, culture supernatant, Genapol pellet and Genapol supernatant fractions of *M. marinum* WT, an ESX-1 mutant (*eccC<sub>b1</sub>* mutant; M<sup>VU</sup>), the *ppe68* operon mutant ( $\Delta ppe35$ -esxA), and the *ppe68\_1* operon mutant ( $\Delta ppe35\_1$ -esxA\_1). Proteins were visualized with anti-EspE and anti-PPE68 (ESX-1 substrates) antibodies. A processed band of 25 kDa was detected by the anti-EspE antibody in the Genapol supernatant fraction of the WT, which has been reported before (44). As a loading and lysis control, blots were incubated with antibodies directed against the cytosolic GroEL2 protein. In all blots, equivalent OD units were loaded: 0.2 OD for pellet and Genapol pellet and 0.4 OD for supernatant and Genapol supernatant fractions. B) Hemoglobin release after incubation of the same strains as under A) with sheep red blood cells. Hemoglobin release was quantified by determining the OD<sub>450</sub> of the medium after incubation.

Figure S4

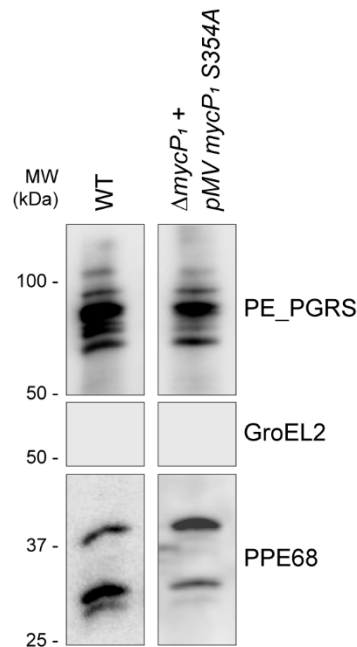

**Figure S4. A point mutation in the active site of serine protease MycP<sub>1</sub> does not affect the processing of PPE68 on the cell surface.** SDS-PAGE and immunostaining of concentrated Genapol supernatant fractions of *M. marinum* WT and a *mycP<sub>1</sub>* deletion mutant complemented with a *mycP<sub>1</sub>* active site (S354A) variant, expressed from a pMV vector by the *hsp60* promotor. Proteins were visualized with an anti-PPE68 antibody. As a loading and lysis control, blots were incubated with antibodies directed against the cytosolic GroEL2 protein and the surface-localized PE\_PGRS proteins. In all blots, equivalent amounts, i.e. 2 OD units, of Genapol supernatant fractions were loaded.

Figure S5

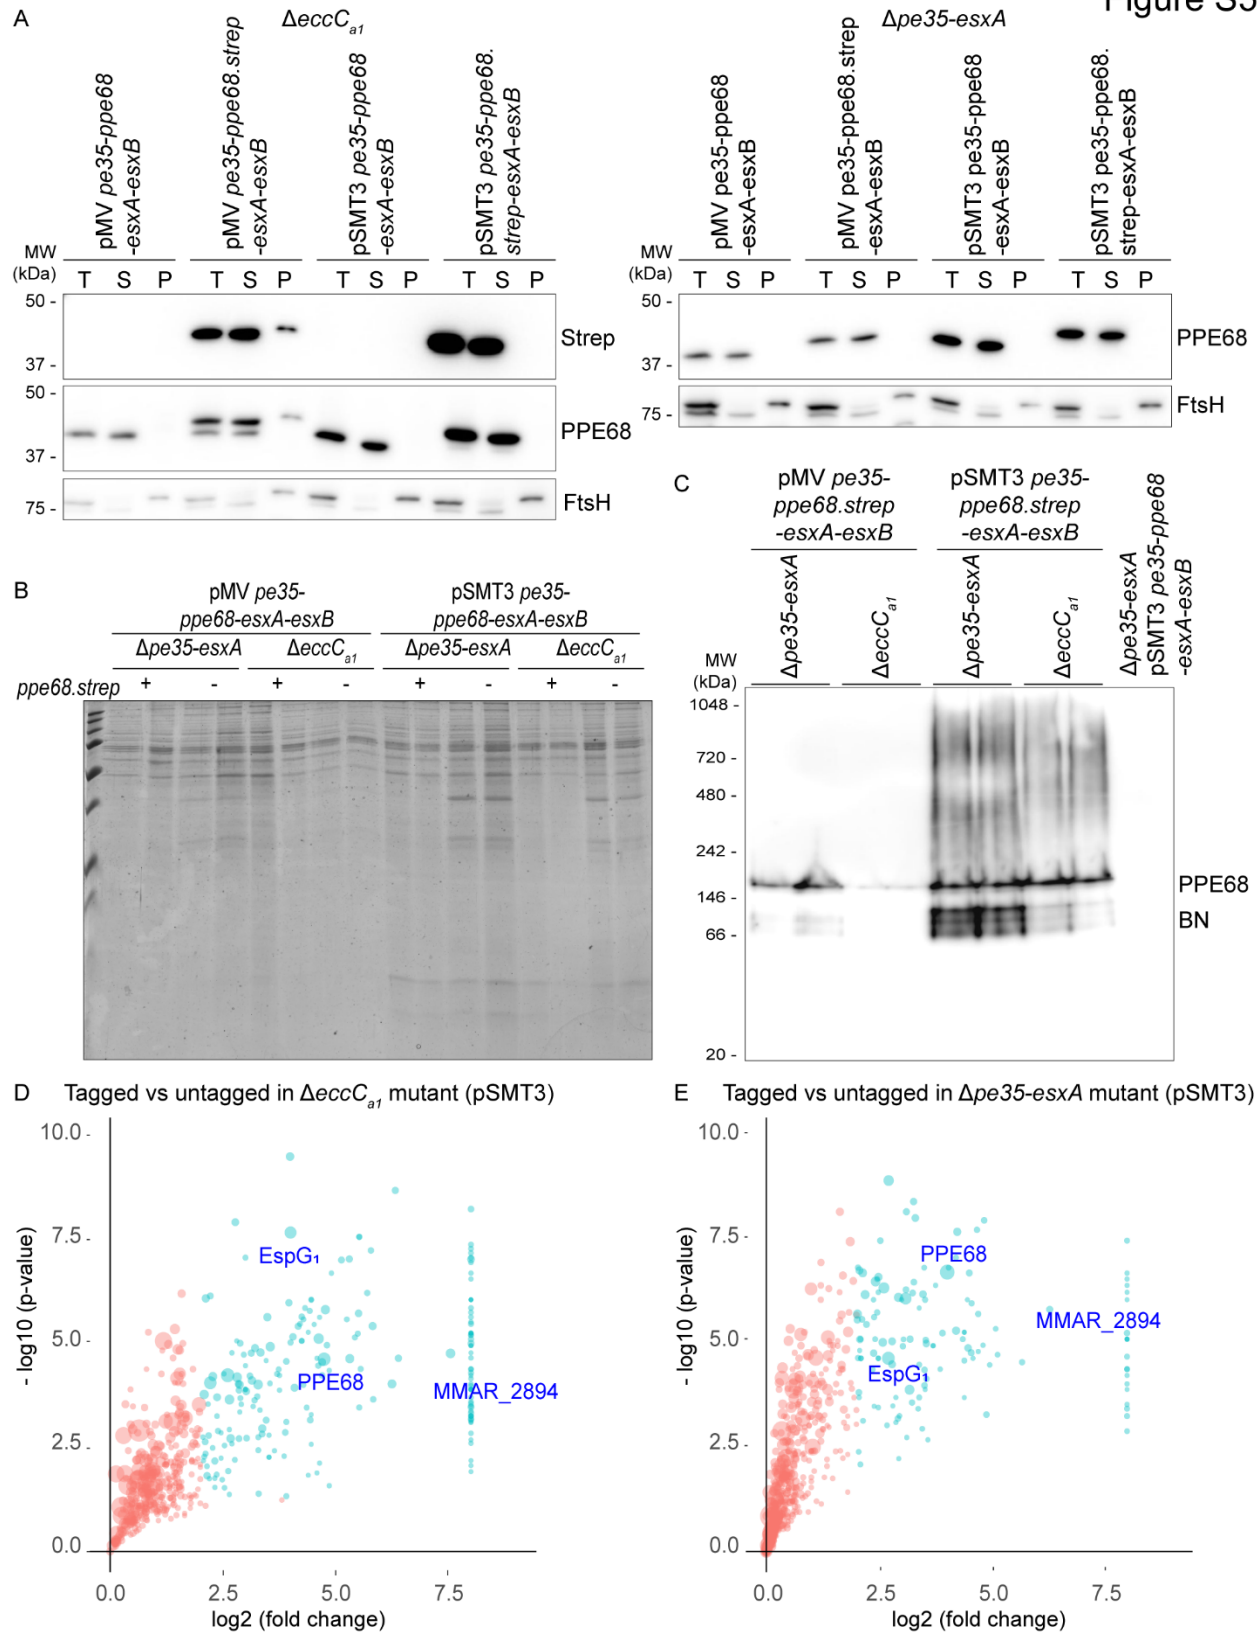

**Figure S5. Purification of PPE68 from the *ppe68* operon mutant and the *eccC<sub>a1</sub>* mutant containing a pMV or pSMT3 vector with the *ppe68* operon of *M. marinum*.** Genes were expressed from the *hsp60* promotor with or without a Strep-tag on the C-terminus of PPE68. A) Immunostaining of subcellular fractionations of the different strains. Proteins were visualized with anti-PPE68 and anti-StrepII antibodies, while anti-FtsH antibodies controlled for the loading and lysis. Notably, the FtsH antiserum cross-reacts with a cytosolic protein. In all blots, equivalent amounts corresponding to 0.2 OD units were loaded. T, total lysate, S, supernatant/soluble proteins, P, pellet/cell envelope proteins. B) Separation of the PPE68 purification samples by SDS-PAGE and subsequent staining with Coomassie Brilliant Blue. C) Separation of complexes in the PPE68 purification samples by BN-PAGE and subsequent staining with Coomassie Brilliant Blue. As a negative control, the purification sample of the *ppe68* operon mutant containing a pSMT3 vector with the *ppe68* operon, without C-terminal Strep-tag on PPE68, was included. D) Quantitative proteomics analysis comparing the PPE68 affinity purification from the soluble fraction of the  $\Delta eccC_{a1}$  mutant and the *ppe68* operon mutant ( $\Delta pe35-esxA$ ) producing PPE68 with or without a Strep-tag on the C-terminus, from a pSMT3 vector. Proteins that show log2 fold change > 2 and a -log10 p-value > 1.3 between tagged and untagged PPE68 are indicated as blue dots. Size of the dots are correlated to the number of spectral counts.

Figure S6

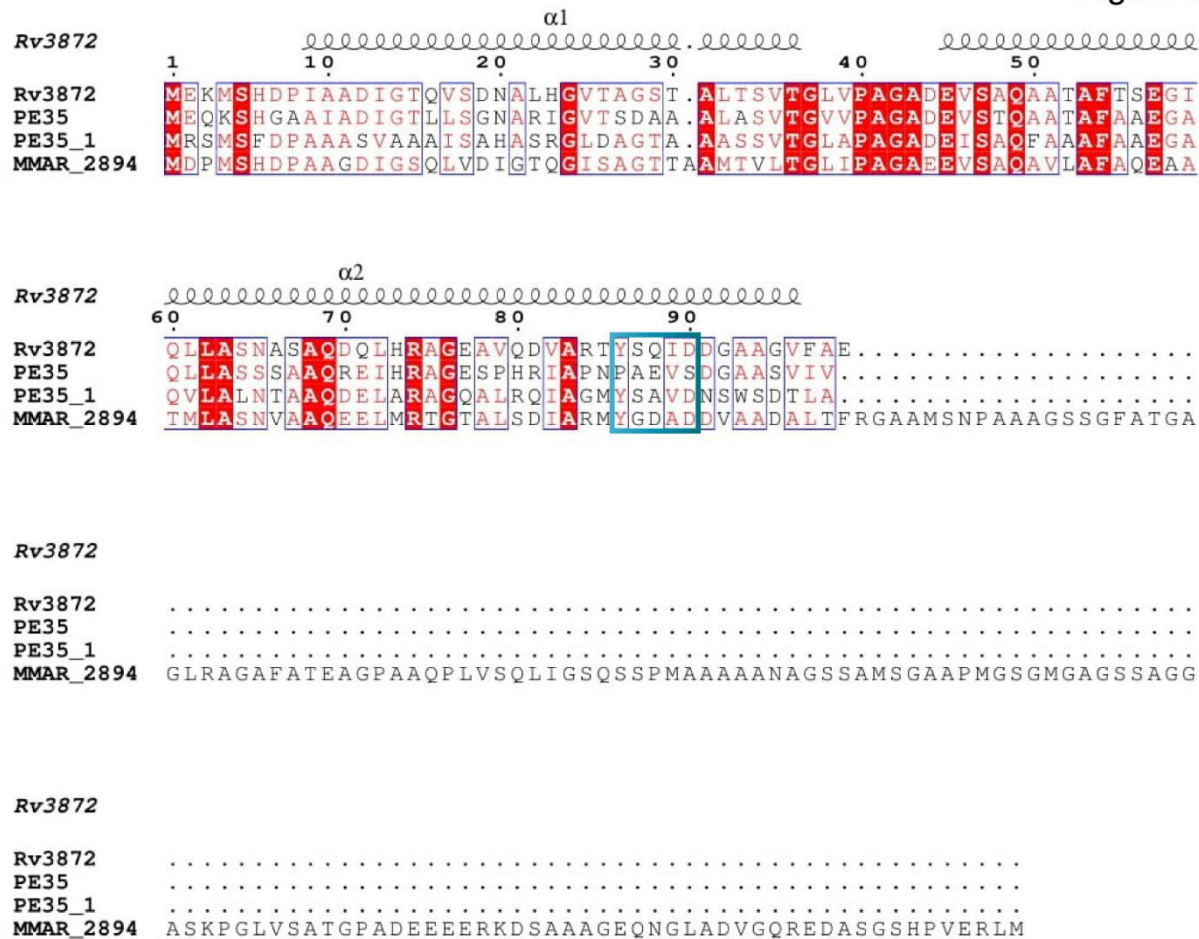

**Figure S6. Protein sequence alignment of PPE35 homologs of *M. marinum* and *M. tuberculosis* including the secondary structure prediction of *M. tuberculosis* PE35.** The secondary structure prediction was produced by AlphaFold. The blue square indicates the conserved YxxxD/E secretion motif. Note that PE35 of *M. marinum* lacks this conserved motif. Rv3872 = PE35 of *M. tuberculosis*, PE35 = MMAR\_5447 of *M. marinum* and PE35\_1 = MMAR\_0185 of *M. marinum*.

Figure S7

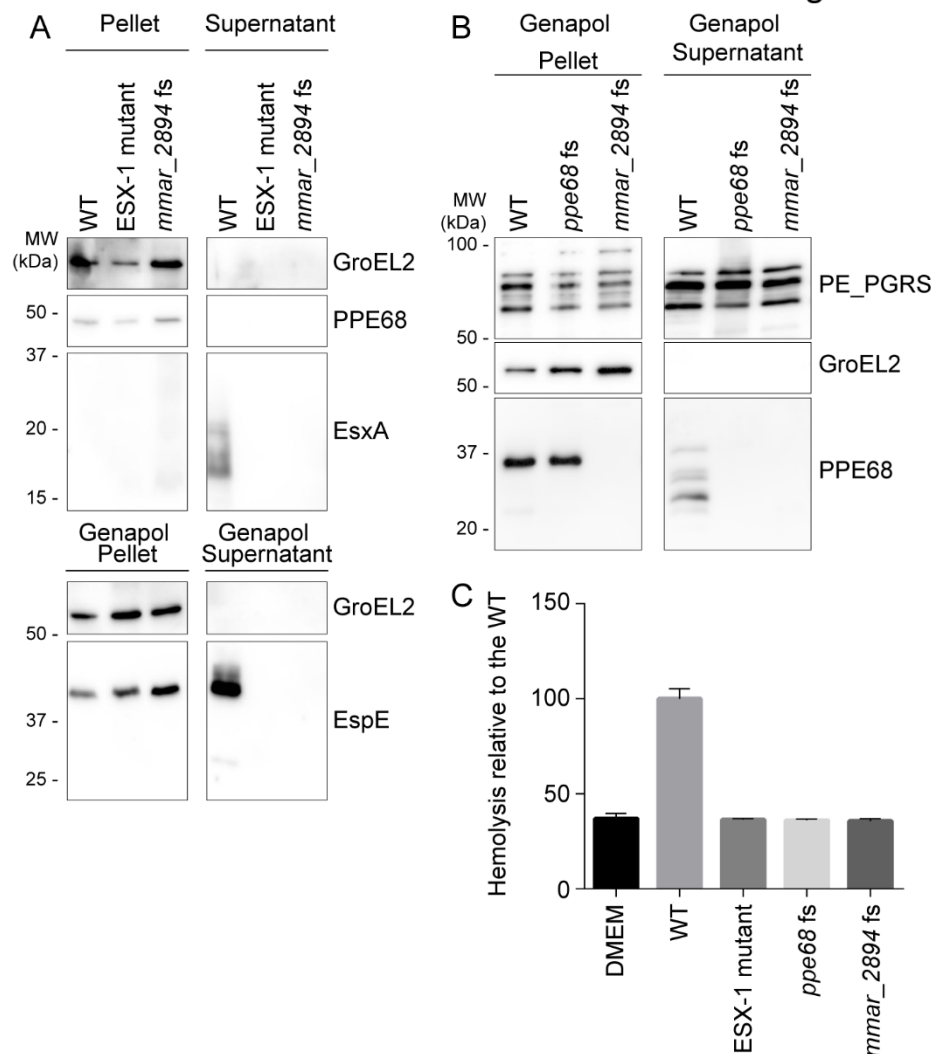

**Figure S7. Secretion and hemolytic analysis of the *MMAR\_2894 fs* mutant.** A) SDS-PAGE and immunostaining of the cell pellet, culture supernatant, Genapol pellet and Genapol supernatant fractions of *M. marinum*, WT, an ESX-1 mutant (*eccC<sub>b1</sub>* mutant;  $M^{VU}$ ) and the *MMAR\_2894 fs* mutant. Proteins were visualized with anti-EsxA, anti-EspE and anti-PPE68 antibodies (ESX-1 substrates). A processed band of 25 kDa was detected by the anti-EspE antibody in the Genapol supernatant fraction of the WT, which has been reported before (42). As a loading and lysis control, blots were incubated with antibodies directed against the cytosolic GroEL2 protein and

1013 the surface-localized PE\_PGRS proteins. In all blots, equivalent OD units were loaded: 0.2 OD for  
 1014 pellet and Genapol pellet and 0.4 OD for supernatant and Genapol supernatant fractions. B) SDS-  
 1015 PAGE and immunostaining of the Genapol pellet and upscaled Genapol supernatant fractions of  
 1016 *M. marinum* WT, the *ppe68* fs mutant and the *mmar\_2894* fs mutant. C) Hemoglobin release  
 1017 after incubation of the same strains explained under A and B with sheep red blood cells,  
 1018 quantified by determining the OD<sub>450</sub> of the medium after incubation.

**Table S1.** Significant hits of PPE68 interactors as determined by protein purification and mass spectrometry analysis. Only proteins with an average normalized spectral counts >5 in the tagged samples, a log2 fold change > 2 and a -log10 p-value of > 1.3 between tagged and untagged samples are shown.

| <b><i>ΔEccCa1::pMV pe35-esxA</i></b> |                                    |                                      |                        |                       | <b><i>Δpe35-esxA::pMV pe35-esxA</i></b> |                                    |                                      |                        |                       |
|--------------------------------------|------------------------------------|--------------------------------------|------------------------|-----------------------|-----------------------------------------|------------------------------------|--------------------------------------|------------------------|-----------------------|
|                                      | Average<br>raw<br>counts<br>tagged | Average<br>raw<br>counts<br>untagged | log2<br>fold<br>change | -log10<br>P-<br>value | Protein                                 | Average<br>raw<br>counts<br>tagged | Average<br>raw<br>counts<br>untagged | log2<br>fold<br>change | -log10<br>P-<br>value |
| <b>EspG<sub>1</sub></b>              | 149.00                             | 20.00                                | 2.90                   | 3.62                  | <b>EspG<sub>1</sub></b>                 | 150.50                             | 17.50                                | 3.10                   | 5.99                  |
| <b>PPE68</b>                         | 81.50                              | 7.00                                 | 3.54                   | 4.80                  | <b>PPE68</b>                            | 115.00                             | 8.50                                 | 3.76                   | 3.58                  |
| <b>MMAR_2894</b>                     | 15.50                              | 0.00                                 | 8.00                   | 2.59                  | <b>MMAR_2894</b>                        | 36.00                              | 0.00                                 | 8.00                   | 5.79                  |
|                                      |                                    |                                      |                        |                       | <b>NrdE</b>                             | 22.50                              | 5.00                                 | 2.17                   | 1.44                  |
|                                      |                                    |                                      |                        |                       | <b>HemD</b>                             | 11.00                              | 0.00                                 | 8.00                   | 1.57                  |
|                                      |                                    |                                      |                        |                       | <b>FadH</b>                             | 11.00                              | 1.00                                 | 3.46                   | 3.07                  |
|                                      |                                    |                                      |                        |                       | <b>HupB</b>                             | 10.50                              | 0.50                                 | 4.39                   | 2.25                  |
|                                      |                                    |                                      |                        |                       | <b>FtsE</b>                             | 9.00                               | 1.50                                 | 2.58                   | 2.02                  |
|                                      |                                    |                                      |                        |                       | <b>MMAR_2279</b>                        | 8.50                               | 0.00                                 | 8.00                   | 1.34                  |
|                                      |                                    |                                      |                        |                       | <b>FabD</b>                             | 8.00                               | 0.50                                 | 4.00                   | 1.59                  |
|                                      |                                    |                                      |                        |                       | <b>RplW</b>                             | 8.00                               | 1.50                                 | 2.42                   | 2.11                  |
|                                      |                                    |                                      |                        |                       | <b>RhlE</b>                             | 7.50                               | 1.00                                 | 2.91                   | 1.99                  |
|                                      |                                    |                                      |                        |                       | <b>MMAR_5479</b>                        | 7.00                               | 1.00                                 | 2.81                   | 1.62                  |
|                                      |                                    |                                      |                        |                       | <b>RpsS</b>                             | 6.50                               | 0.00                                 | 8.00                   | 1.59                  |
|                                      |                                    |                                      |                        |                       | <b>PlsC</b>                             | 6.00                               | 0.00                                 | 8.00                   | 1.30                  |
|                                      |                                    |                                      |                        |                       | <b>MMAR_1001</b>                        | 6.00                               | 0.00                                 | 8.00                   | 1.30                  |
|                                      |                                    |                                      |                        |                       | <b>AhpC</b>                             | 5.50                               | 0.00                                 | 8.00                   | 2.70                  |
|                                      |                                    |                                      |                        |                       | <b>RpmF</b>                             | 5.50                               | 1.00                                 | 2.46                   | 2.04                  |
|                                      |                                    |                                      |                        |                       | <b>AsnB</b>                             | 5.50                               | 1.00                                 | 2.46                   | 1.54                  |
|                                      |                                    |                                      |                        |                       | <b>ProB</b>                             | 5.50                               | 1.00                                 | 2.46                   | 1.44                  |
|                                      |                                    |                                      |                        |                       | <b>ChoD_1</b>                           | 5.50                               | 0.00                                 | 8.00                   | 1.84                  |



1025 **Table S2.** Strains and plasmids used in this study.

| Strain/plasmid                                        | Characteristics                                    | Origin                                     | Reference                                       |
|-------------------------------------------------------|----------------------------------------------------|--------------------------------------------|-------------------------------------------------|
| <i>M. marinum</i> M                                   | Wild-type                                          |                                            | Abdallah <i>et al.</i> 2006                     |
| <i>M. marinum</i> $\Delta$ eccC <sub>b1</sub>         | ESX-1 complex mutant                               | <i>M. marinum</i> M                        | Abdallah <i>et al.</i> 2009                     |
| <i>M. marinum</i> $\Delta$ eccC <sub>o1</sub>         | ESX-1 complex mutant                               | <i>M. marinum</i> M                        | This study                                      |
| <i>M. marinum</i> $\Delta$ espG <sub>1</sub>          | ESX-1 chaperone mutant                             | <i>M. marinum</i> M                        | Phan <i>et al.</i> 2017                         |
| <i>M. tuberculosis</i> mc <sup>2</sup> 6020           | $\Delta$ LysA $\Delta$ panCD                       | <i>M. tuberculosis</i> H37Rv               | Sambandamurthy <i>et al.</i> 2005               |
| <i>M. marinum</i> ppe68 fs                            | NZ_CP058277.1g6.590.143_6.590.144insC              | <i>M. marinum</i> M                        | This study                                      |
| <i>M. marinum</i> mmar_2894 fs                        | NZ_CP058277.1g3.498.899_3.498.911del               | <i>M. marinum</i> M                        | This study                                      |
| <i>M. marinum</i> pecABC fs                           |                                                    | <i>M. marinum</i> M                        | Manuscript in progress (Meijers <i>et al.</i> ) |
| <i>M. marinum</i> $\Delta$ mmar_5447-50               |                                                    | <i>M. marinum</i> M                        | This study                                      |
| <i>M. marinum</i> $\Delta$ mmar_0185-88               |                                                    | <i>M. marinum</i> M                        | This study                                      |
| pMV::esxB/esxA                                        | pMV361 backbone, hsp60 promoter, hygR, integrative | WT <i>M. marinum</i> M, mmar_5449-50       | This study                                      |
| pMV::mmar_5447/pep68                                  | pMV361 backbone hsp60 promoter, hygR, integrative  | WT <i>M. marinum</i> M, mmar_5447-48       | This study                                      |
| pMV::mmar_5447/pep68/esxB/esxA                        | pMV361 backbone hsp60 promoter, hygR, integrative  | WT <i>M. marinum</i> M, mmar_5447-50       | This study                                      |
| pSMT3::mmar_5447/pep68/esxB/esxA                      | pSMT3 backbone, hsp60 promoter, hygR, multicopy    | WT <i>M. marinum</i> M, mmar_5447-50       | This study                                      |
| pSMT3::pe35/pep68/esxB/esxA                           | pSMT3 backbone, hsp60 promoter, hygR, multicopy    | WT <i>M. tuberculosis</i> H37Rv, rv3872-75 | This study                                      |
| pMV::mmar_5447/pep68.strep/esxB/esxA                  | pMV361 backbone hsp60 promoter, hygR, integrative  | WT <i>M. marinum</i> M, mmar_5447-50       | This study                                      |
| pSMT3::mmar_5447/pep68.strep                          | pSMT3 backbone, hsp60 promoter, hygR, multicopy    | WT <i>M. marinum</i> M, mmar_5447-48       | This study                                      |
| pSMT3::mmar_5447/pep68.strep/esxB/esxA                | pSMT3 backbone, hsp60 promoter, hygR, multicopy    | WT <i>M. marinum</i> M, mmar_5447-50       | This study                                      |
| pSMT3::mmar_5447/pep68 $\Delta$ Cterm.strep/esxB/esxA | pSMT3 backbone, hsp60 promoter, hygR, multicopy    | WT <i>M. marinum</i> M, mmar_5447-50       | This study                                      |
| pSMT3::pe35/pep68_1.strep/esxB_1/esxA_1               | pSMT3 backbone, hsp60 promoter, hygR, multicopy    | WT <i>M. marinum</i> M, mmar_0185-88       | This study                                      |

**Table S2.** Strains and plasmids used in this study; continued.

| Strain/plasmid                                                       | Characteristics                                     | Origin                                             | Reference                                        |
|----------------------------------------------------------------------|-----------------------------------------------------|----------------------------------------------------|--------------------------------------------------|
| pSMT3::mmar_5447/ppe68_1ΔC-term + C-term ppe68.strep/esxB/esxA       | pSMT3 backbone, hsp60 promoter, hygR, multicopy     | WT <i>M. marinum</i> M, mmar_0185-86, mmar_5448-50 | This study                                       |
| pSMT3::mmar_5447/ppe68F125A.strep/esxB/esxA                          | pSMT3 backbone, hsp60 promoter, hygR, multicopy     | WT <i>M. marinum</i> M, mmar_5447-50               | This study                                       |
| pSMT3::mmar_5447/ppe68_1ΔC-term L125A + C-term ppe68.strep/esxB/esxA | pSMT3 backbone, hsp60 promoter, hygR, multicopy     | WT <i>M. marinum</i> M, mmar_0185-86, mmar_5448-50 | This study                                       |
| pSMT3::mmar_5447/ppe68ΔC10.strep/esxB/esxA                           | pSMT3 backbone, hsp60 promoter, hygR, multicopy     | WT <i>M. marinum</i> M, mmar_5447-50               | This study                                       |
| pSMT3::mmar_5447/ppe68ΔC112.strep/esxB/esxA                          | pSMT3 backbone, hsp60 promoter, hygR, multicopy     | WT <i>M. marinum</i> M, mmar_5447-50               | This study                                       |
| pTdTomato-L5                                                         | pMV361 backbone hsp60 promoter, StrepR, integrative |                                                    | Meijers 2020 Addgene 140994                      |
| pCRISPRx-Sth1Cas9-L5::sgRNA-ppe68                                    | TetR, KanR, integrative                             | WT <i>M. marinum</i> M, mmar_5448                  | This study, based on Meijers 2020 Addgene 140993 |
| pCRISPRx-Sth1Cas9-L5::sgRNA-mmar_2894                                | TetR, KanR, integrative                             | WT <i>M. marinum</i> M, mmar_2894                  | This study, based on Meijers 2020 Addgene 140993 |

1030 **Table S3.** Primers used in this study.

| Oligonucleotide      | Sequence                                         | Use                                                                               |
|----------------------|--------------------------------------------------|-----------------------------------------------------------------------------------|
| EsxB_XmnI_FW         | TTTGAAAGAATTCCATATGGCAGAGATGA<br>AGACCGATGCC     | Cloning <i>esxB/esxA</i> into pMV                                                 |
| EsxA_HindIII_RV      | TTTAAGCTTTTAAGCAAACATCCCCGTGAC<br>GTT            | Cloning <i>esxB/esxA</i> into pMV                                                 |
| Pe35_XmnI_FW         | TTTGAAAGAATTCATGGAACAAAAGTCAC<br>ACGGCG          | Cloning <i>pe35/ppe68</i> into pMV                                                |
| Ppe68_HindIII_RV     | TTTAAGCTTTCACCAGTCGTCCTCGTCATC<br>CCA            | Cloning <i>pe35/ppe68</i> into pMV                                                |
| Pe35_NheI_FW         | TTTGCTAGCATGGAACAAAAGTCACACGG<br>CG              | Cloning <i>pe35/ppe68/esxB/esxA</i> into<br>pSMT3                                 |
| EsxA_BamHI_RV        | TTTGGATCCTTAAGCAAACATCCCCGTGAC<br>GTT            | Cloning <i>pe35/ppe68/esxB/esxA</i> into<br>pSMT3                                 |
| PPE68.strep_BamHI_RV | TTTGGATCCTCACTTCTCGAACTGCGGGTG<br>G              | Cloning <i>pe35/ppe68</i> into pSMT3                                              |
| PPE68_strep_RV       | AACTGCGGGTGGCTCCAAGCGCTCCAGTC<br>GTCCTCGTCATCCCA | Cloning Strep-tag sequence into <i>ppe68</i>                                      |
| Ppe68_EsxB_strep_FW  | GAGCCACCCGCAGTTCGAGAAGTGAGCGT<br>CGTCAACACGAAC   | Cloning Strep-tag sequence into <i>ppe68</i>                                      |
| Pe35mtb_NheI_FW      | TTTGCTAGCATGGAAAAAATGTCACATGA<br>TCCGATCG        | Cloning <i>rv3872-75</i> into pSMT3                                               |
| EsxAmtb_BamHI_RV     | TTTGGATCCCTATGCGAACATCCCAGTGAC<br>G              | Cloning <i>rv3872-75</i> into pSMT3                                               |
| NheI_PE35_1_FW       | GAATCACGCTAGCATGCGATCC                           | Cloning <i>mmar_0185-88</i> into pSMT3                                            |
| BamHI_EsxA_1_RV      | ATCCATGGATCCTAGCCGAACA                           | Cloning <i>mmar_0185-88</i> into pSMT3                                            |
| PPE68dC_strep_RV     | CGGGTGGCTCCAAGCGCTCTGTGCAGTGG<br>CGGGAT          | Cloning <i>ppe68</i> with a C-terminal<br>deletion after 525 bp (175 amino acids) |
| PPE68dC_strep_FW     | ATCCCGCCACTGCACAGAGCGCTTGGAGC<br>CACCCG          | Cloning <i>ppe68</i> with a C-terminal<br>deletion after 525 bp (175 amino acids) |
| PPE68_1_strep_RV     | AACTGCGGGTGGCTCCAAGCGCTCCAGTC<br>GTCGTCGTCATCCC  | Cloning Strep-tag sequence into<br><i>ppe68_1</i>                                 |
| PPE68_1_strep_FW     | GAGCCACCCGCAGTTCGAGAAGTGAGAG<br>TCGTTGCTAGGAAA   | Cloning Strep-tag sequence into<br><i>ppe68_1</i>                                 |
| PPE68tub_strep_RV    | AACTGCGGGTGGCTCCAAGCGCTCCAGTC<br>GTCCTCTTCGTCCC  | Cloning Strep-tag sequence into <i>rv3875</i>                                     |
| PPE68tub_strep_FW    | GAGCCACCCGCAGTTCGAGAAGTGAGCTC<br>CCGTAATGACAACA  | Cloning Strep-tag sequence into <i>rv3875</i>                                     |
| PPE68 cut FW         | GGGA GCGTGGACCGGAGGCGGCAG                        | sgRNA for generation of frameshift<br>mutant                                      |
| PPE68 cut RV         | AAAC CTGCCGCCTCCGGTCCACGC                        | sgRNA for generation of frameshift<br>mutant                                      |
| 2894_FW              | AAAC AGCCGCCACATTGGACGCCAAC                      | sgRNA for generation of frameshift<br>mutant                                      |

1032 **Table S3.** Primers used in this study; continued.

| Oligonucleotide             | Sequence                                   | Use                                       |
|-----------------------------|--------------------------------------------|-------------------------------------------|
| 2894_RV                     | GGGA GTTGGCGTCCAATGTGGCGGCT                | sgRNA for generation of frameshift mutant |
| MMAR_5447-50 Left Flank Fw  | TTTTTTTTCACAAAGTGGCCTTCGTCAGTG<br>AGTTTCC  | Generation of knockout strains            |
| MMAR_5447-50 Left Flank Rev | TTTTTTTTCACCTTCGTGAGCGTTGCCGCTC<br>AATAGTG | Generation of knockout strains            |
| MMAR_5447-50 RF Fw 2        | TTTTTTTTCACAGAGTGAGGCCGGTCAGG<br>CAATGTCC  | Generation of knockout strains            |
| MMAR_5447-50 RF Rev 2       | TTTTTTTTCACCTTGTGCTGCGGTGGCTCT<br>GCTGAGG  | Generation of knockout strains            |
| MMAR_0185-88 KO LF          | TTTTTTTTCATAAATTGGTGACGCGGACA<br>GCGTTAATA | Generation of knockout strains            |
| MMAR_0185-88 KO LR          | TTTTTTTTCATTCTTGGTGACAACCTCT<br>CTGCACTA   | Generation of knockout strains            |
| MMAR_0185-88 KO RF          | TTTTTTTTCATAGATTGGAGGCCGGTCAG<br>GCAATGTCC | Generation of knockout strains            |
| MMAR_0185-88 KO RR          | TTTTTTTTCATCTTTTGGCGGTGAGTGC<br>AGCCACCAA  | Generation of knockout strains            |
| EccC1 KO LF                 | TTTTTTTTCACAAAGTGGCGATGCTGGCGG<br>ACTATCA  | Generation of knockout strains            |
| EccC1 KO LR                 | TTTTTTTTCACCTTCGTGGTGCCGACGATGG<br>ACAGAAG | Generation of knockout strains            |
| EccC1 KO RF                 | TTTTTTTTCACAGAGTGTTGCGTACCACCA<br>GCTCTCA  | Generation of knockout strains            |
| EccC1 KO RR                 | TTTTTTTTCACCTTGTGGGTGTGCATGTGG<br>CTGTAAG  | Generation of knockout strains            |
| SigA-FW                     | GAAAAACCACCTGCTGGAAG                       | Phan et al., 2017                         |
| SigA-RV                     | CGCGTAGGTGGAGAACTTGT                       | Phan et al., 2017                         |
| EsxA3 qPCR F                | GCATCCAGCGCAATTCAGGG                       | Phan et al., 2017                         |
| EsxA3 qPCR R                | GCGAGTTGTTGAGCTCCTGC                       | Phan et al., 2017                         |

1033
